# Supplementary material for: Levels and Health Risk Assessment of Organochlorine Residues in Vegetables from Rivers Niger-Benue Confluence in Lokoja, North Central, Nigeria
Source: Research Square preprint supplement (doi:10.21203/rs.3.rs-5968584/v1), 2025-04-01

**Supplementary Information File for Paper Publication**

**TOPIC**:

**LEVELS AND HEALTH RISK ASSESSMENT OF ORGANOCHLORINE**

**RESIDUES IN VEGETABLES FROM RIVERS NIGER-BENUE CONFLUENCE IN LOKOJA, NORTH CENTRAL NIGERIA**

**Problem Statement**

Micropollutants include trace metals, polycyclic aromatic hydrocarbons (PAHs), and organochlorine pesticide residues (OCPs). OCPs can accumulate in plants and animals and have the ability to travel great distances. There have been reports of severe health consequences, including headache, dizziness, anger, nausea, vomiting, anxiety, disorientation, convulsions, reproductive problems, neurotoxicity, tremor, hypertension, cardiovascular illnesses, human skin disorders, and cancer.

Pesticides are used by farmers all over the world, including in Nigeria, as a preventative measure against the potential for catastrophic crop loss due to pests and diseases.

Humans are exposed to OCPs through skin contact, contaminated food consumption, and direct inhalation. However there arose the need to check the levels and health risk assessment of organochlorine residues in vegetables cultivated and consumed around Rivers Niger – Benue Confluence in Lokoja, North Central Nigeria. Therefore this study examined fourteen distinct organochlorine insecticides. These included p,p′-DDE, lindane, α-lindane, β-lindane, methoxychlor, endosulfan, endosulfan I, endosulfan II, endosulfan sulphate, aldrin, heptachlor, heptachlor epoxide and p dieldrin. The possible health risks to humans from consuming contaminated vegetables were calculated, as were the levels of OCP residues in vegetable samples.

**Method**

The extraction was by Ultrasonication, while analysis of Organochlorine was carried out using gas chromatography interfaced with a mass selective detector. The chromatograms obtained after the analysis were given thus

APPENDIX 1: Chromatogram of Tomatoes Sample


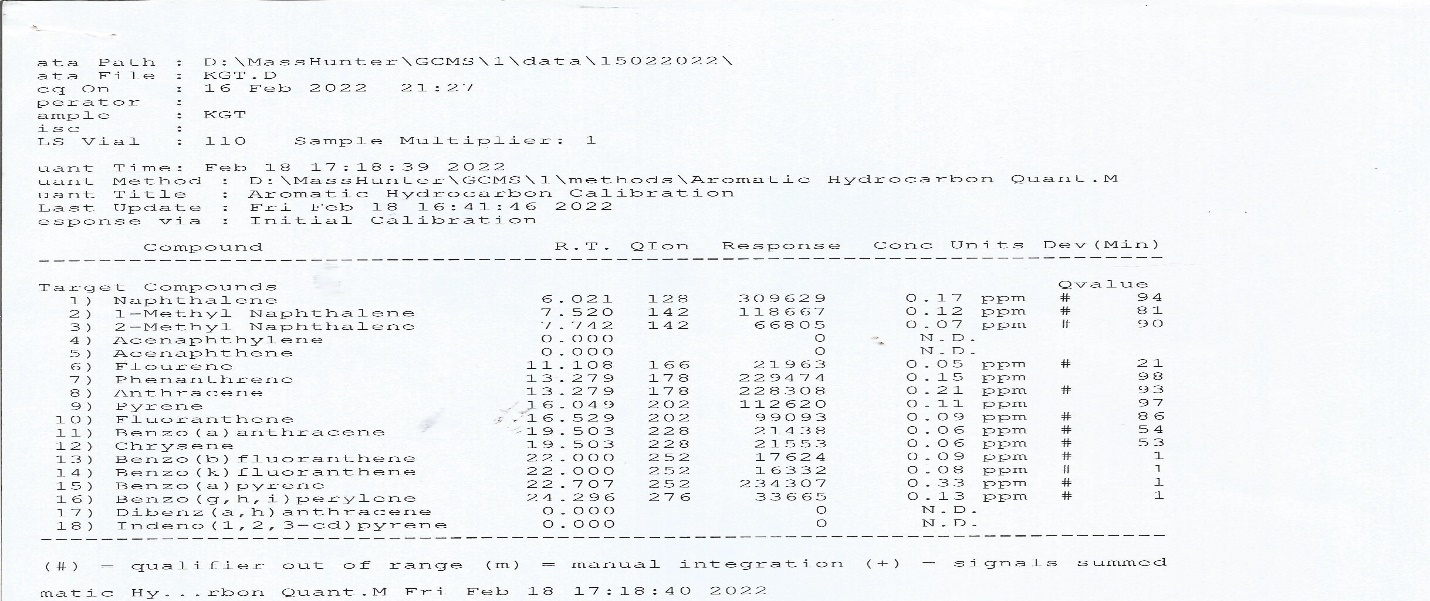


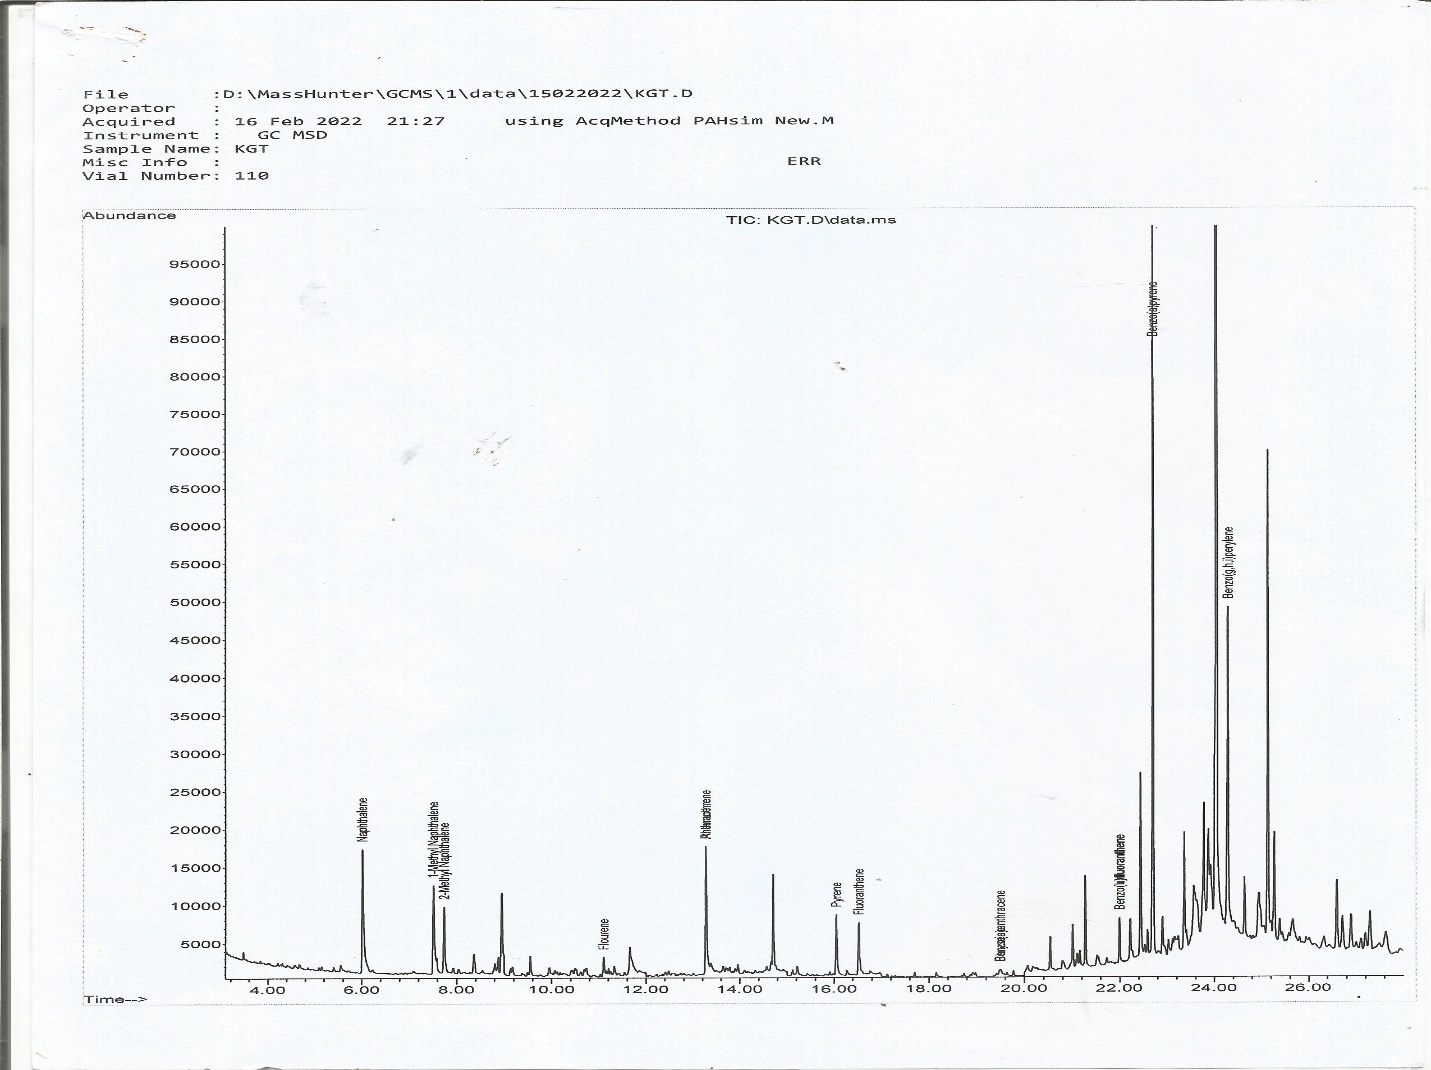


APPENDIX 2: Chromatogram of Spinach Sample


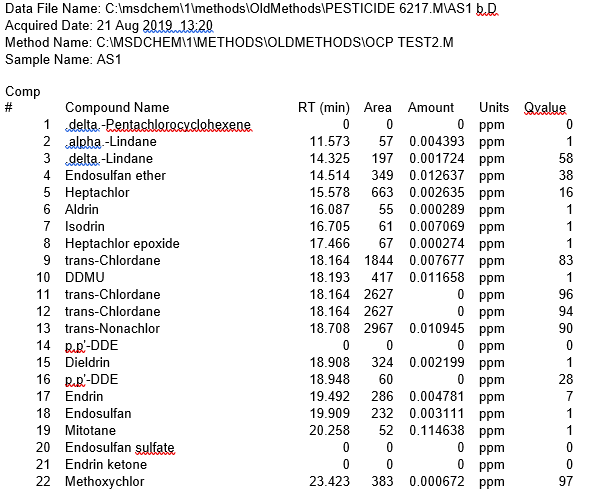


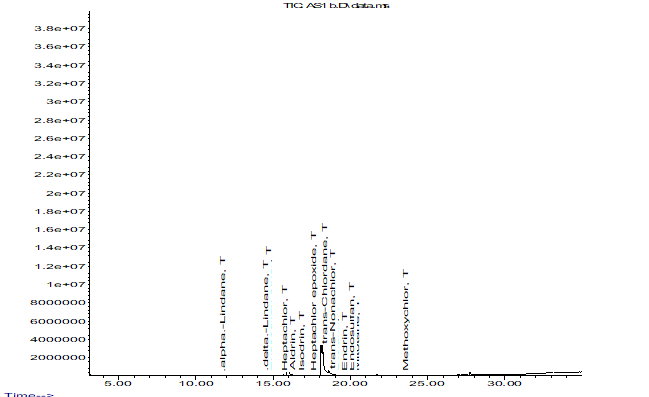


APPENDIX 3: Chromatogram of Spinach Sample


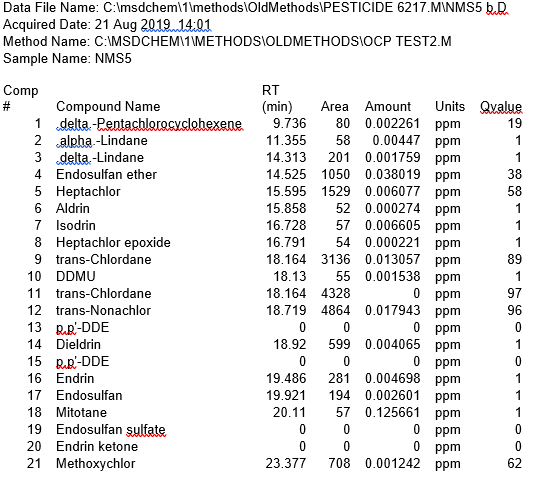


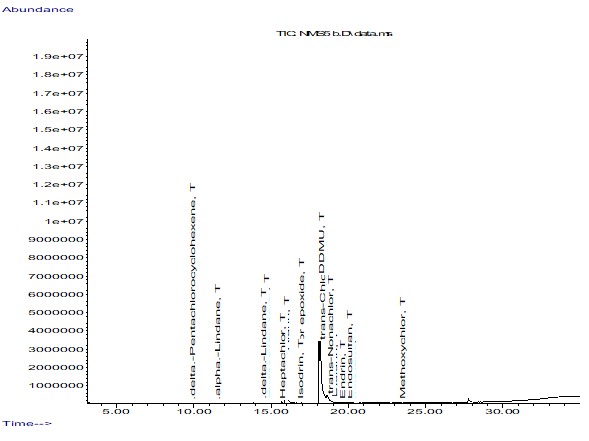


APPENDIX 4: Chromatogram of Spinach Sample


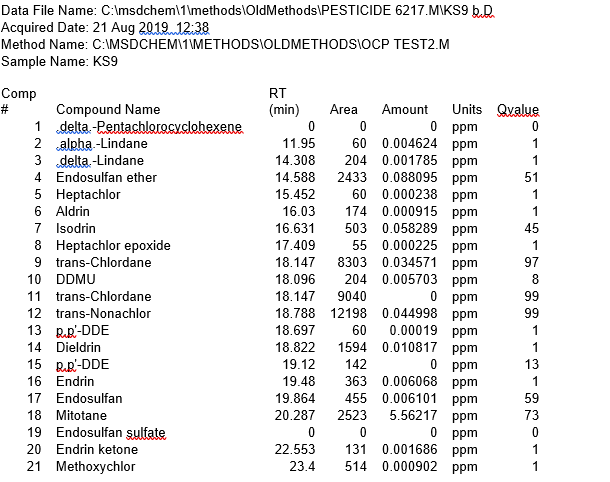


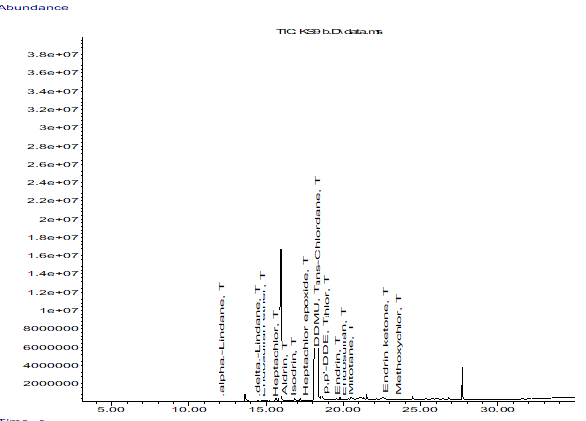


APPENDIX 5: Chromatogram of Spinach Sample


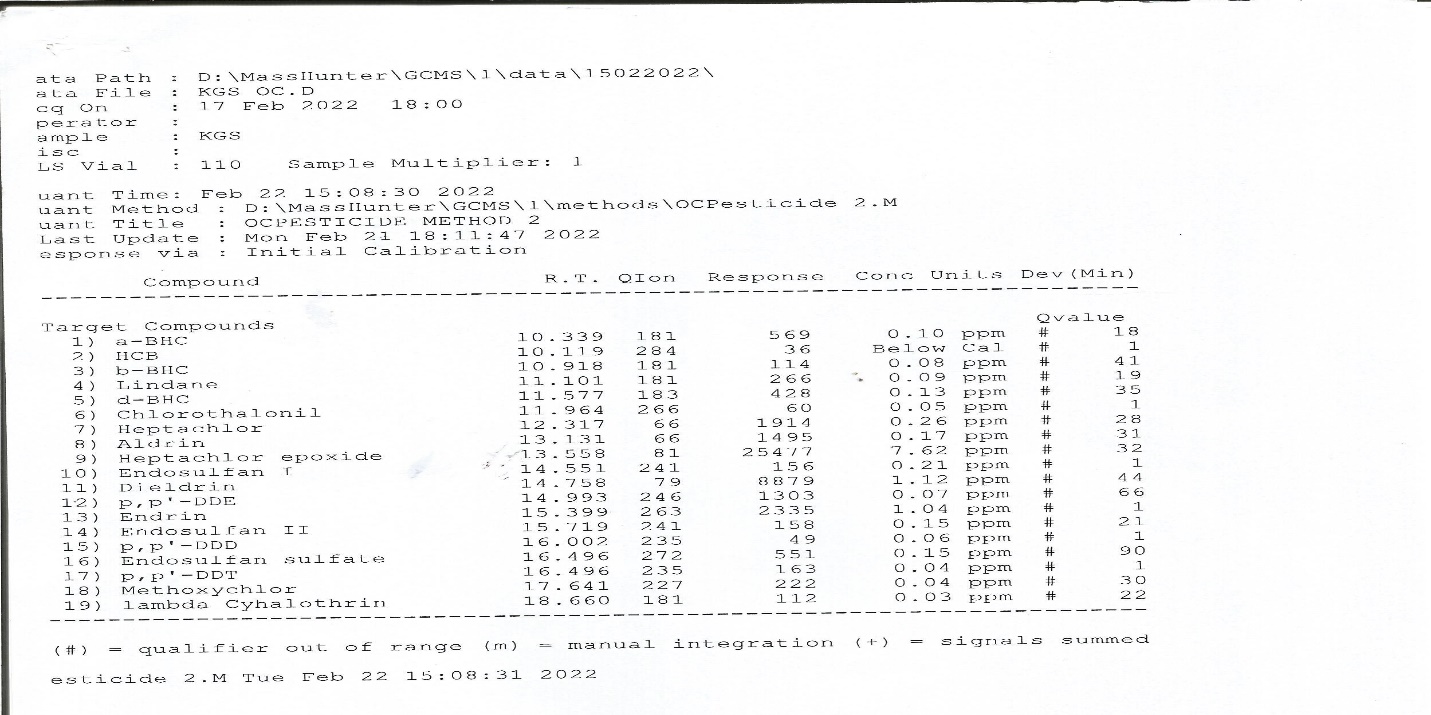


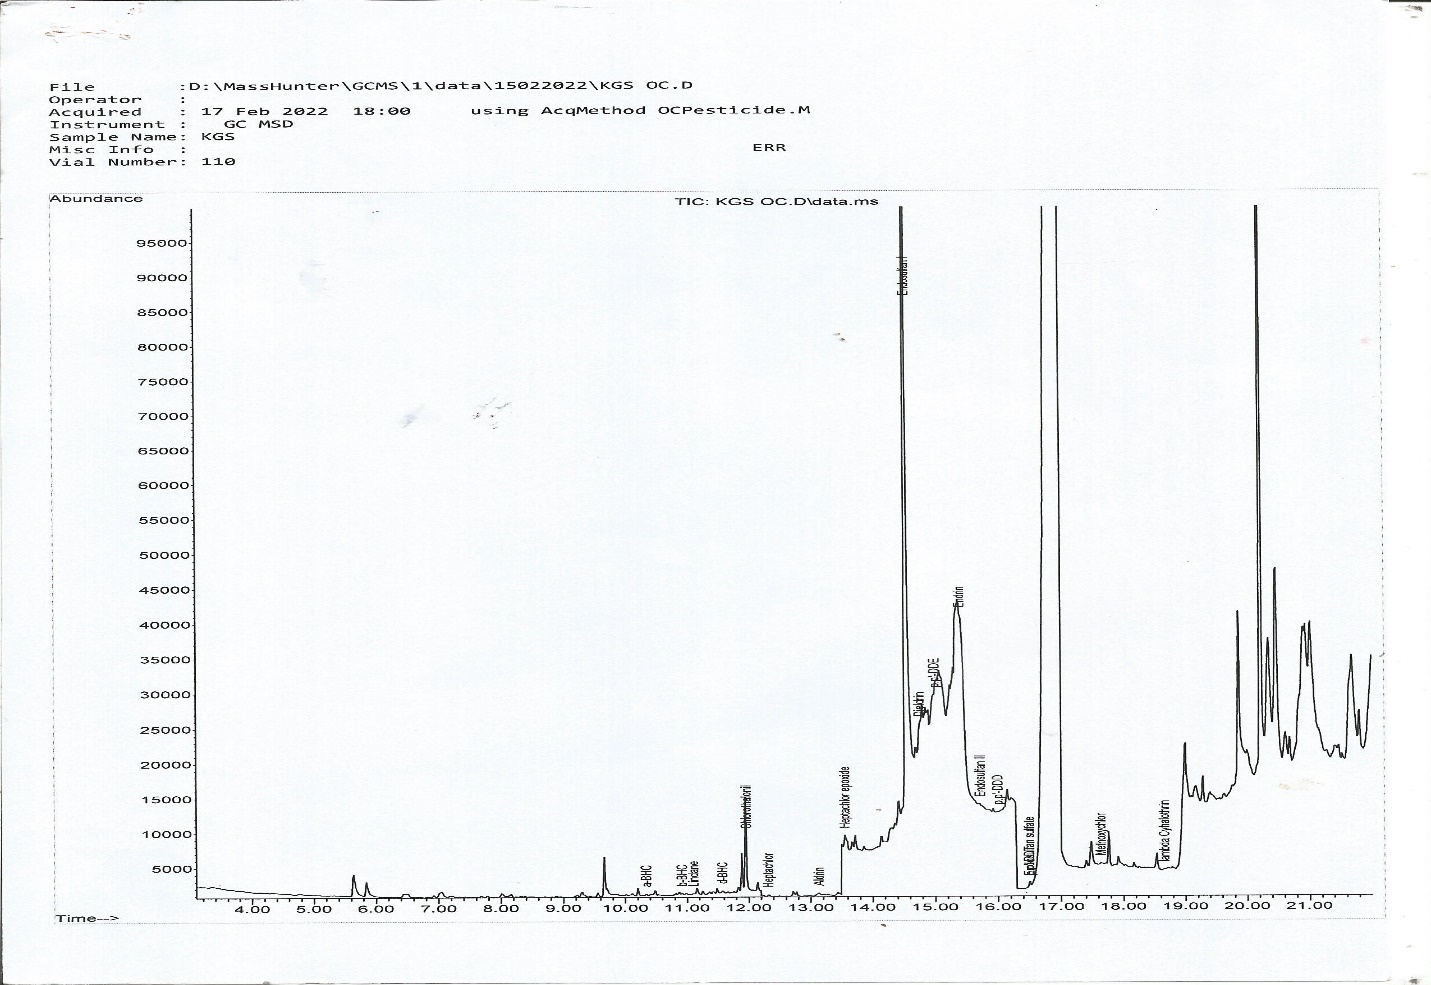


APPENDIX 6: Chromatogram of Spinach Sample


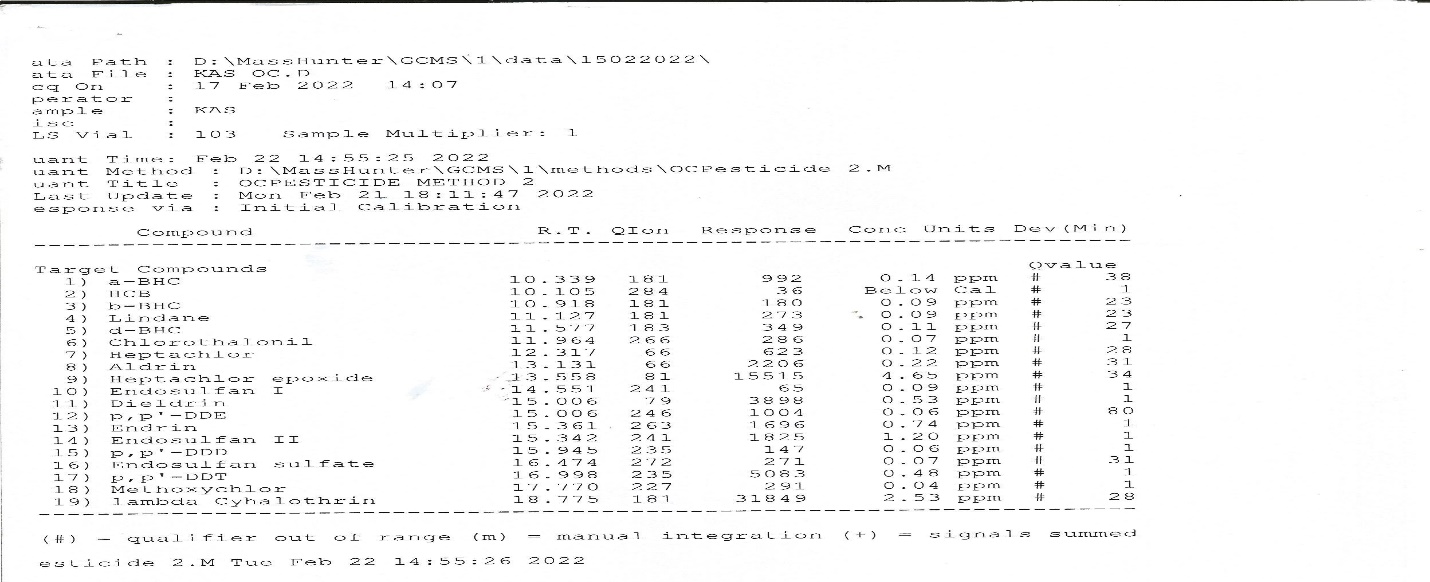


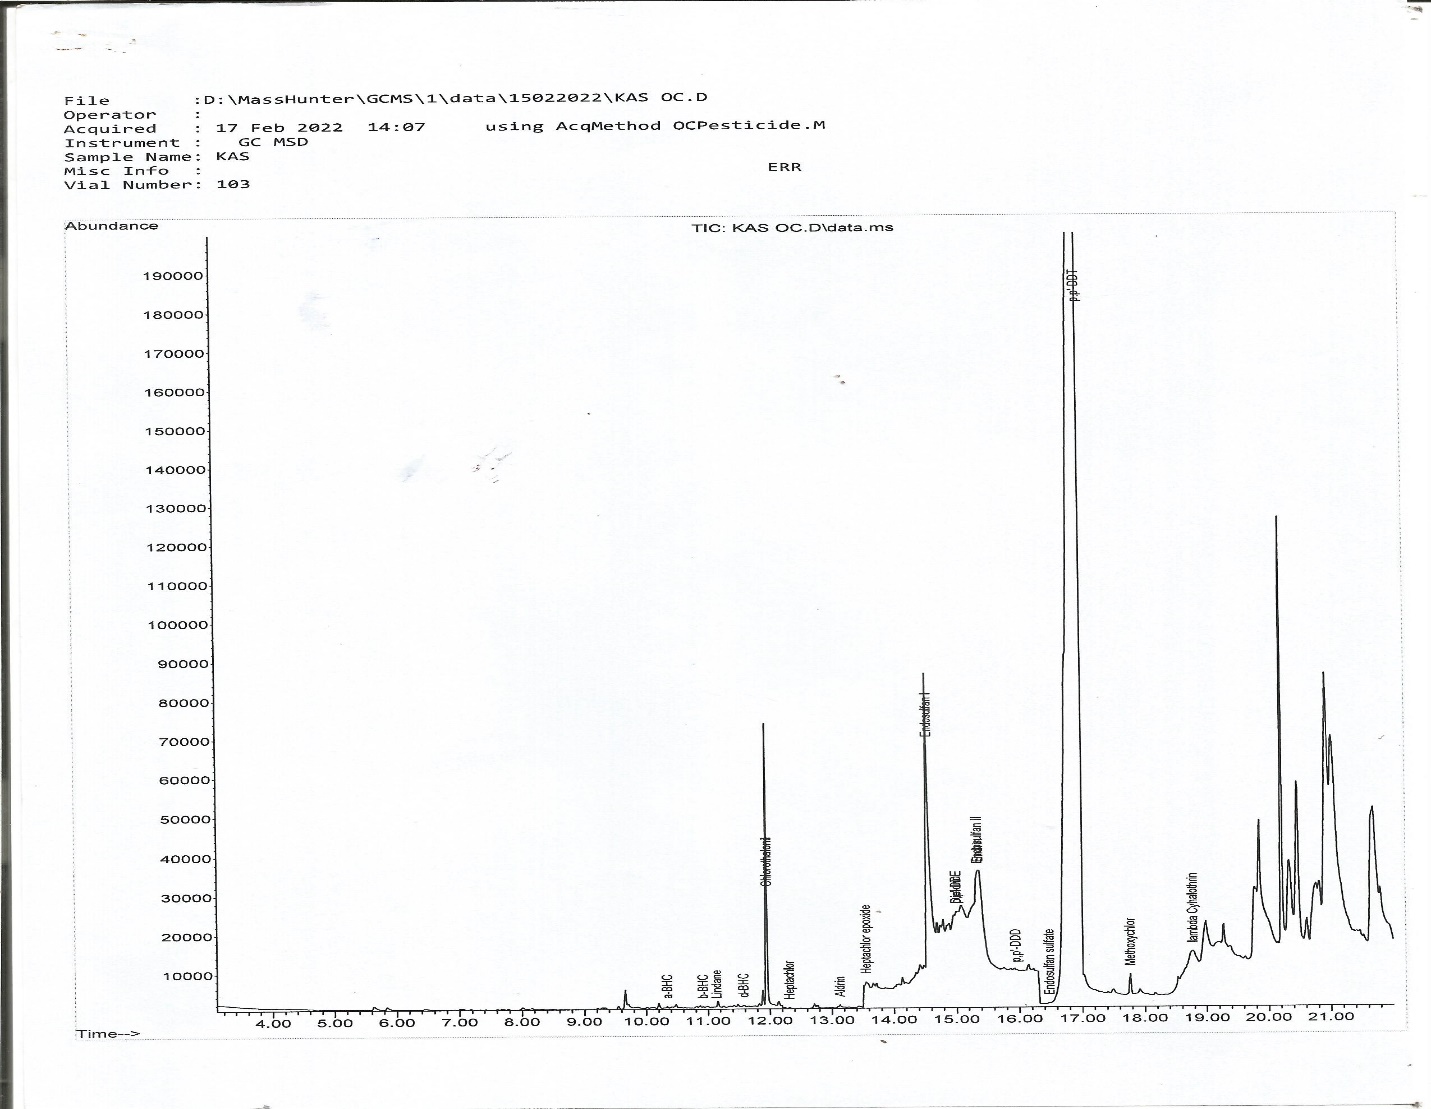


APPENDIX 7: Chromatogram of Pumpkin leaf Sample


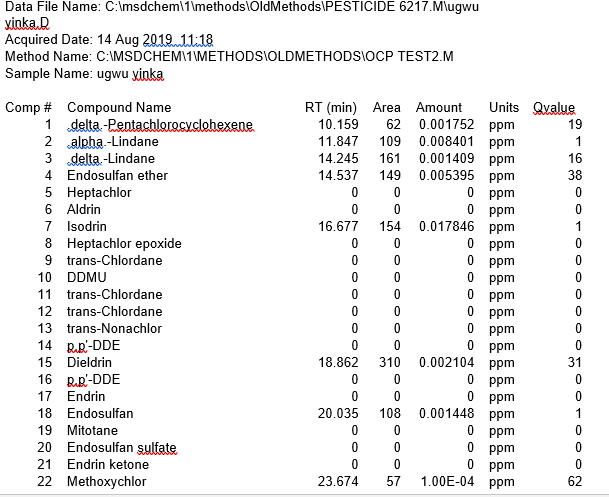


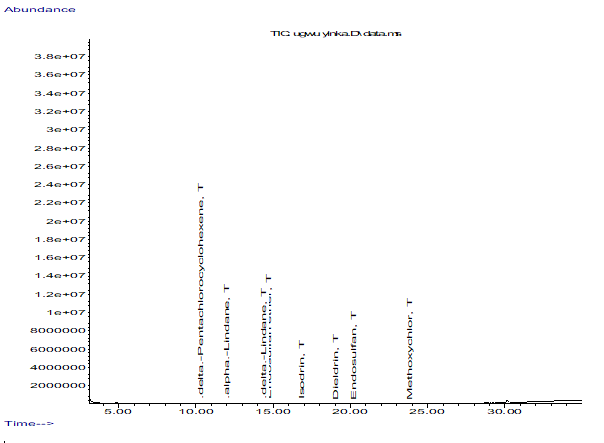


APPENDIX 8: Chromatogram of Pumpkin leaf Sample


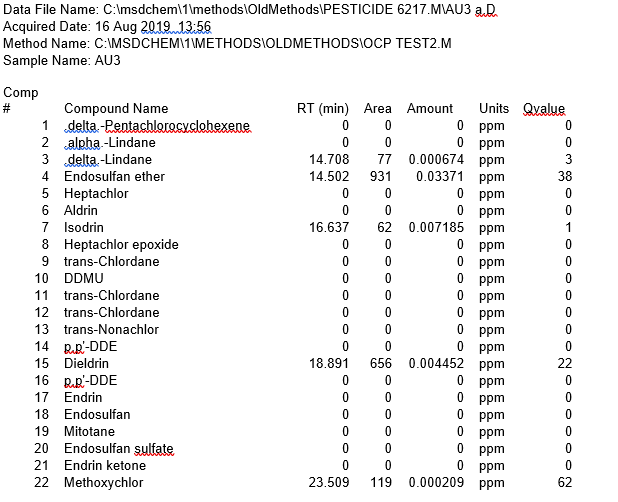


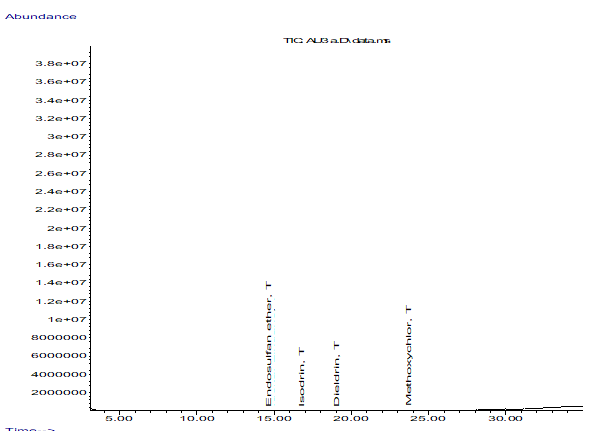


APPENDIX 9: Chromatogram of Pumpkin leaf Sample


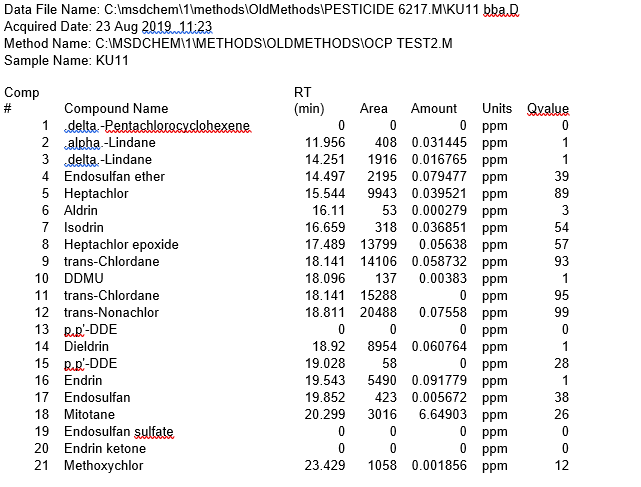


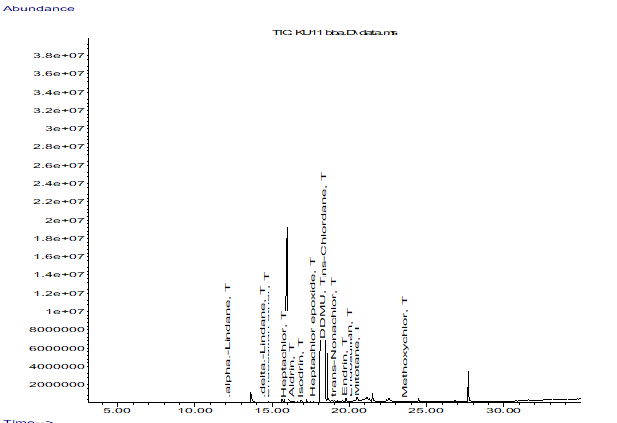


APPENDIX 10: Chromatogram of Pumpkin leaf Sample


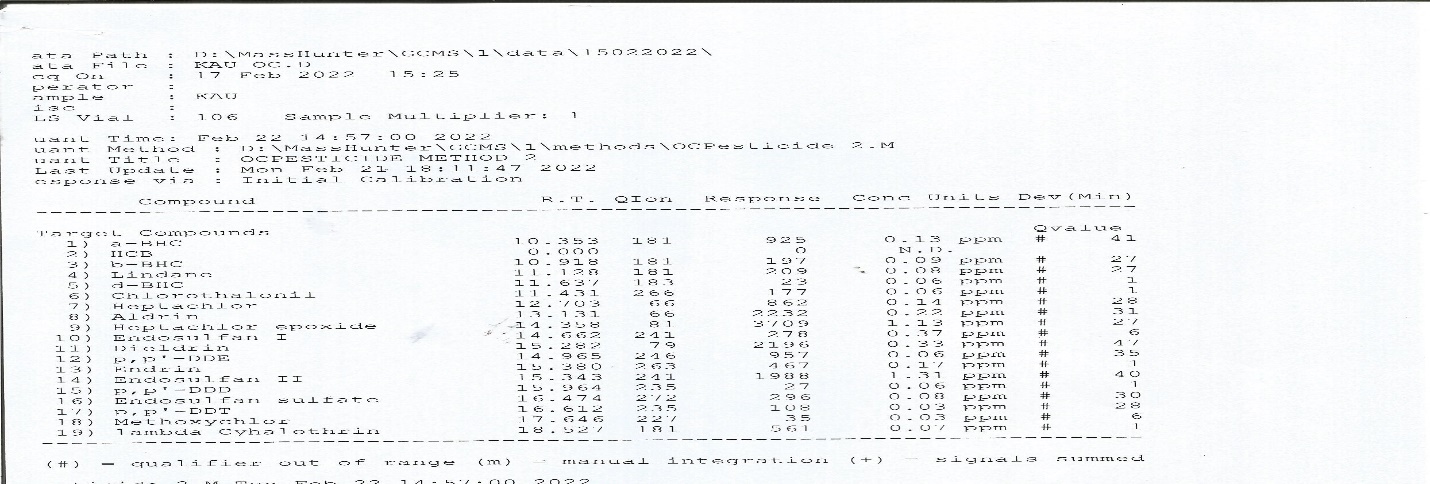


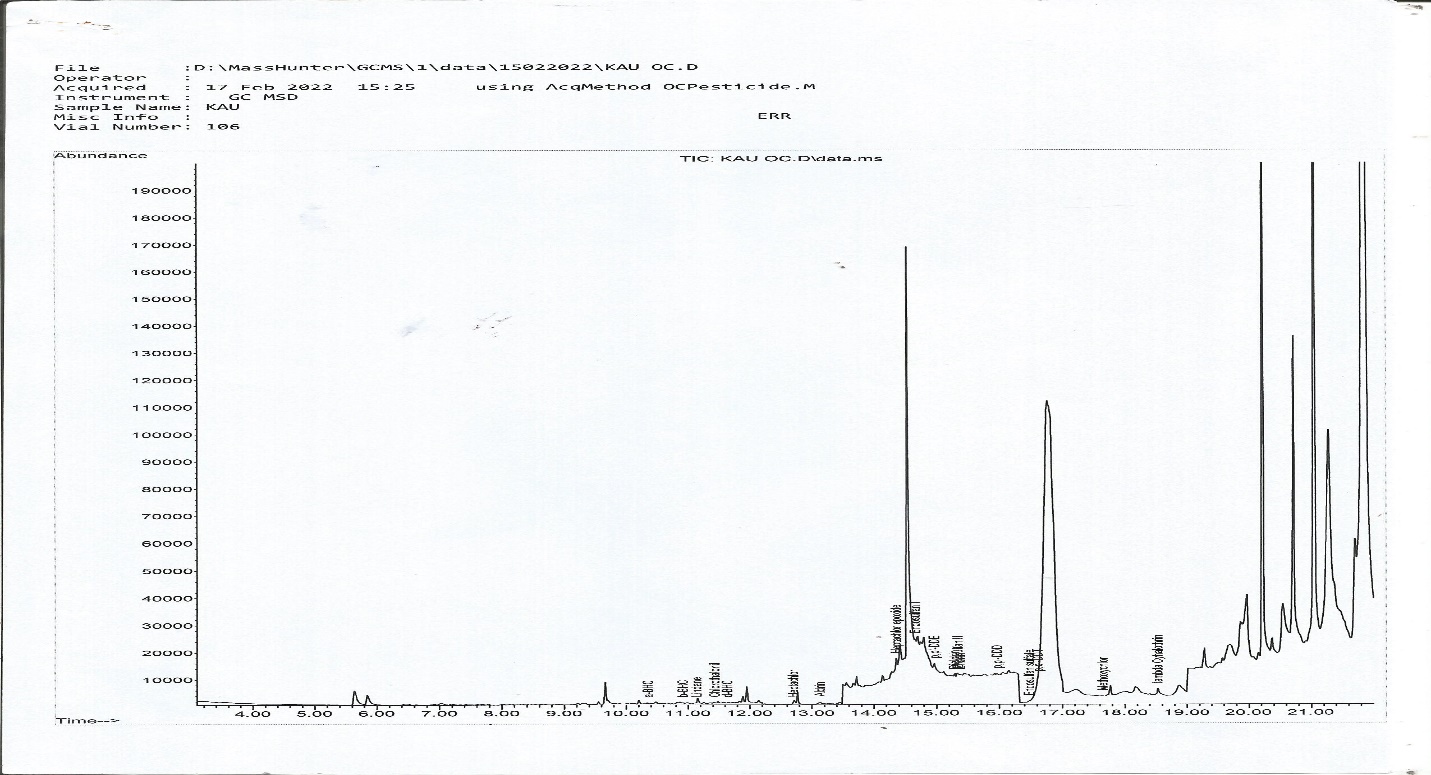


APPENDIX 11: Chromatogram of Pumpkin leaf Sample


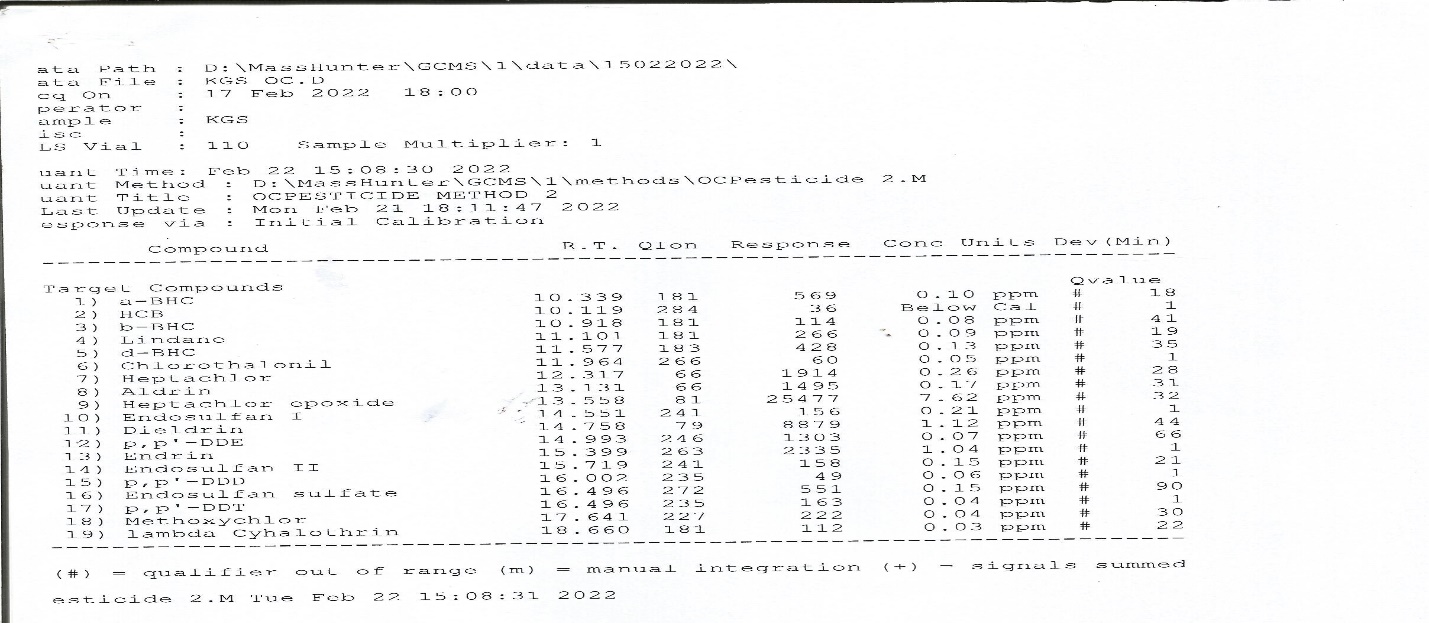


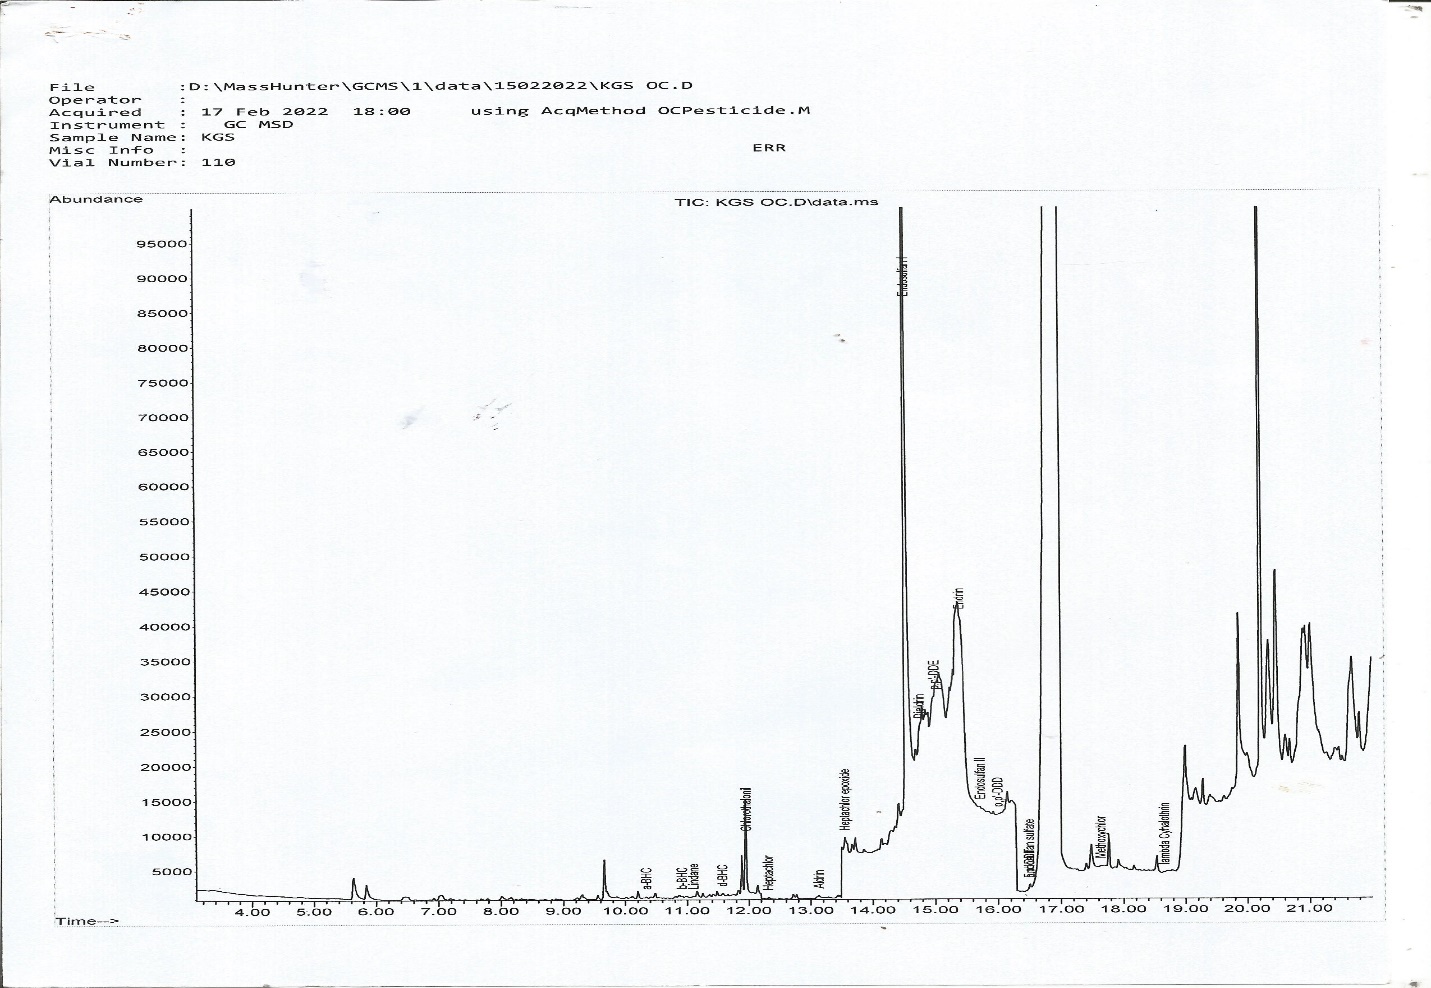


APPENDIX 12: Chromatogram of Jute leaf Sample


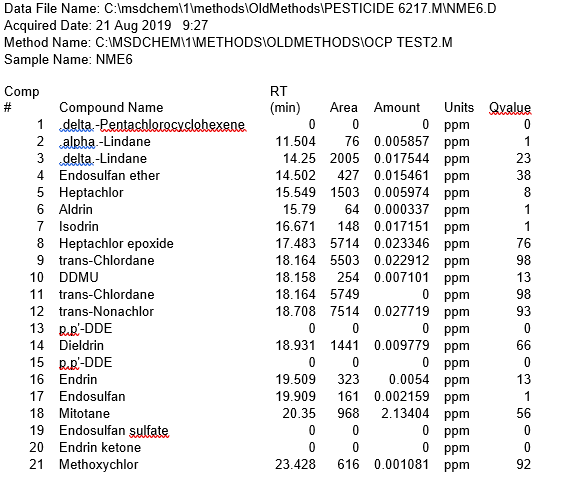


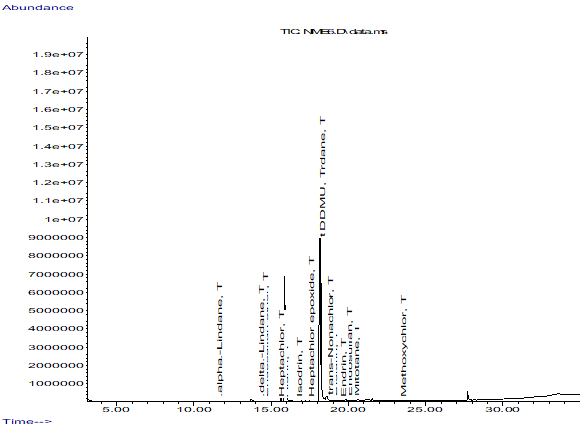


APPENDIX 13: Chromatogram of Jute leaf Sample


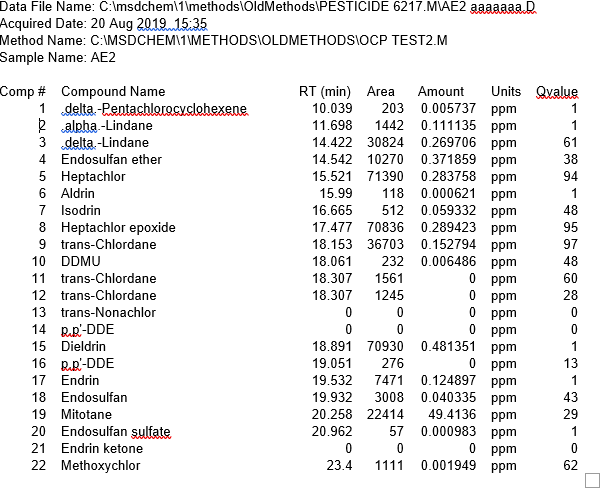


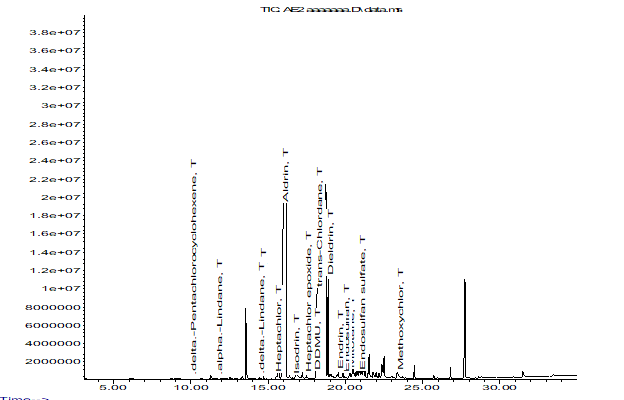


APPENDIX 14: Chromatogram of Jute leaf Sample


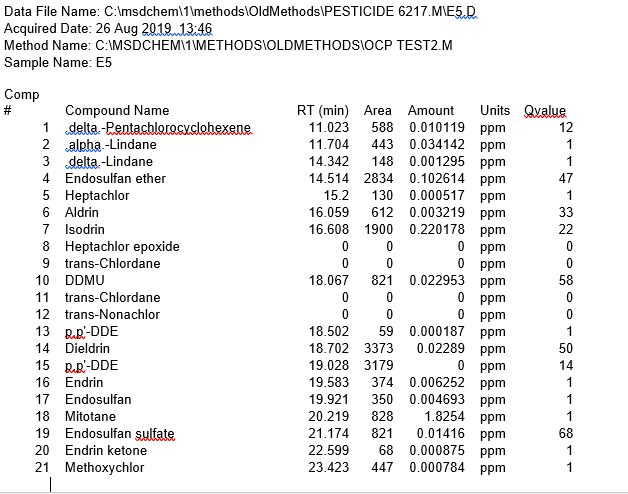


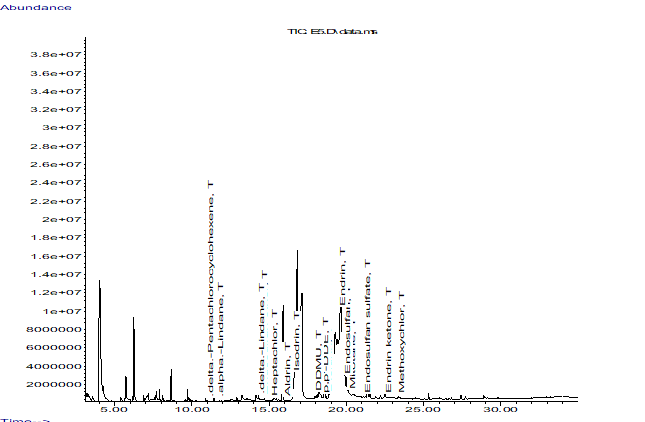


APPENDIX 15: Chromatogram of Jute leaf Sample


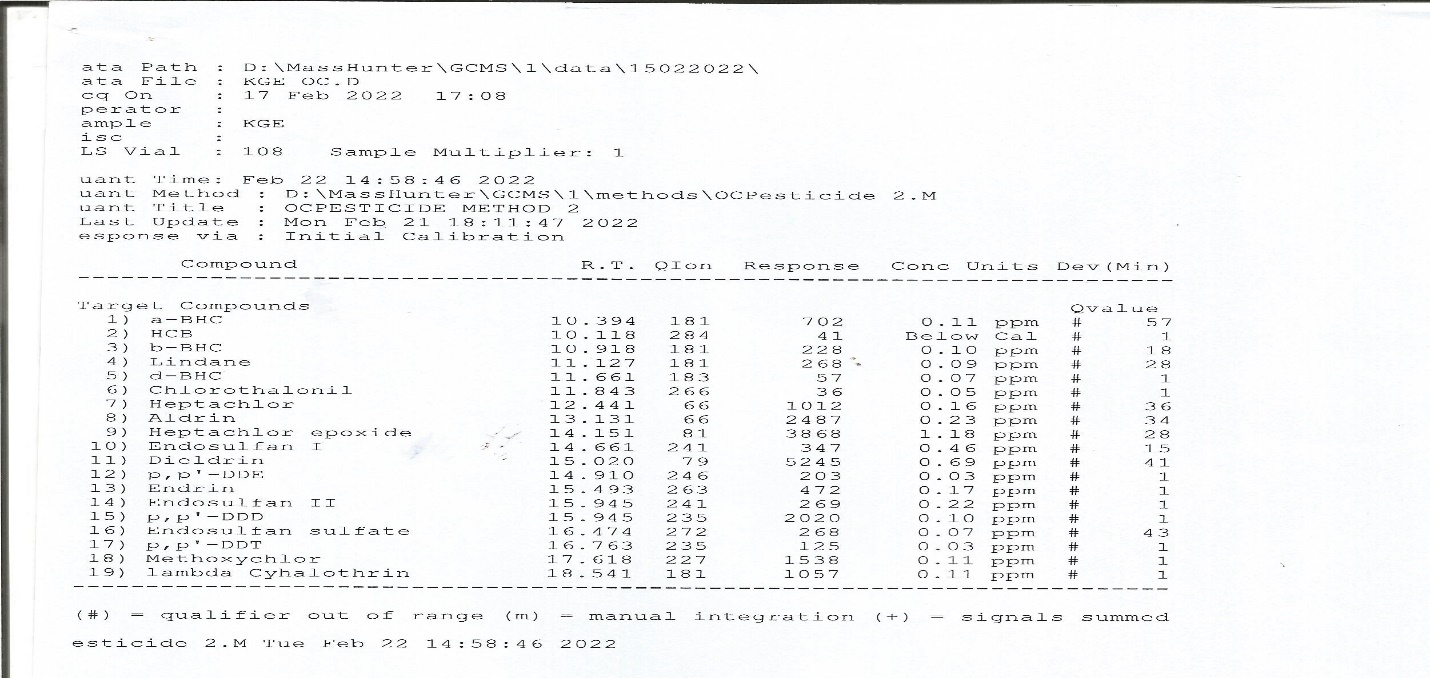


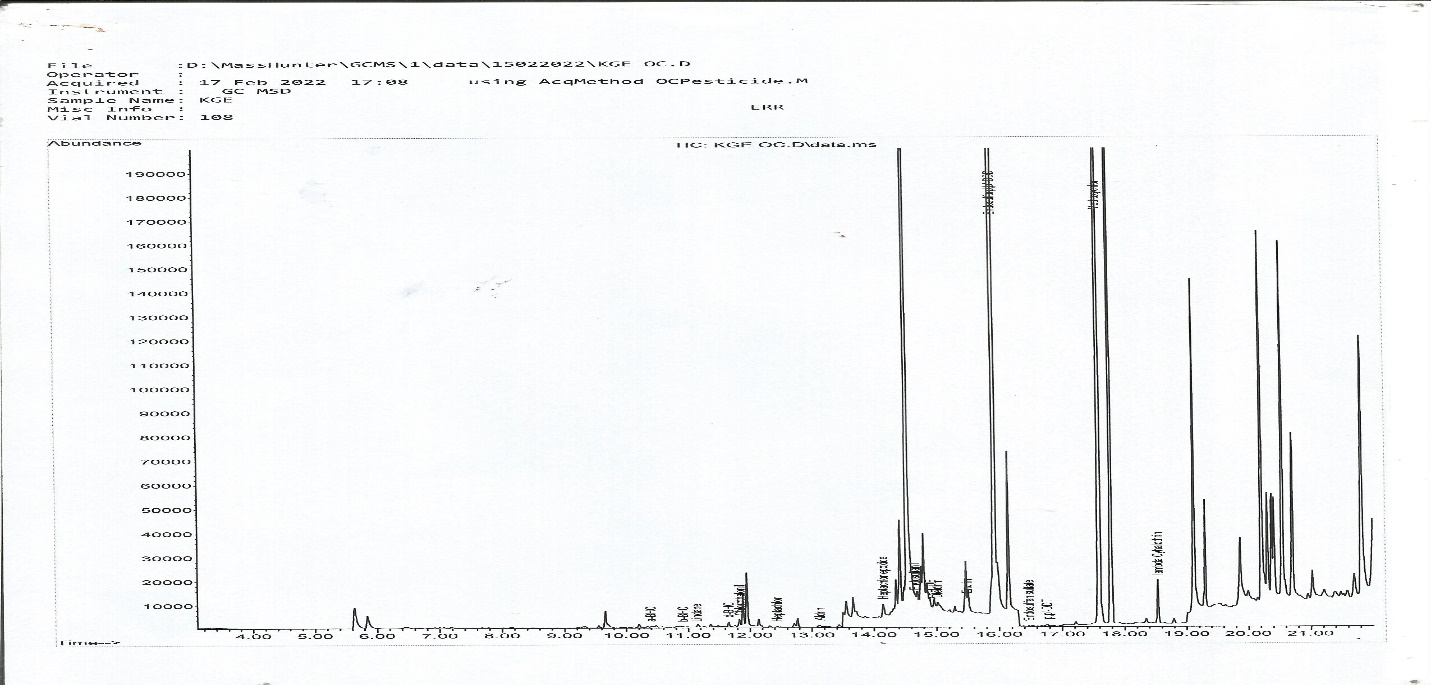


APPENDIX 16: Chromatogram of Jute leaf Sample


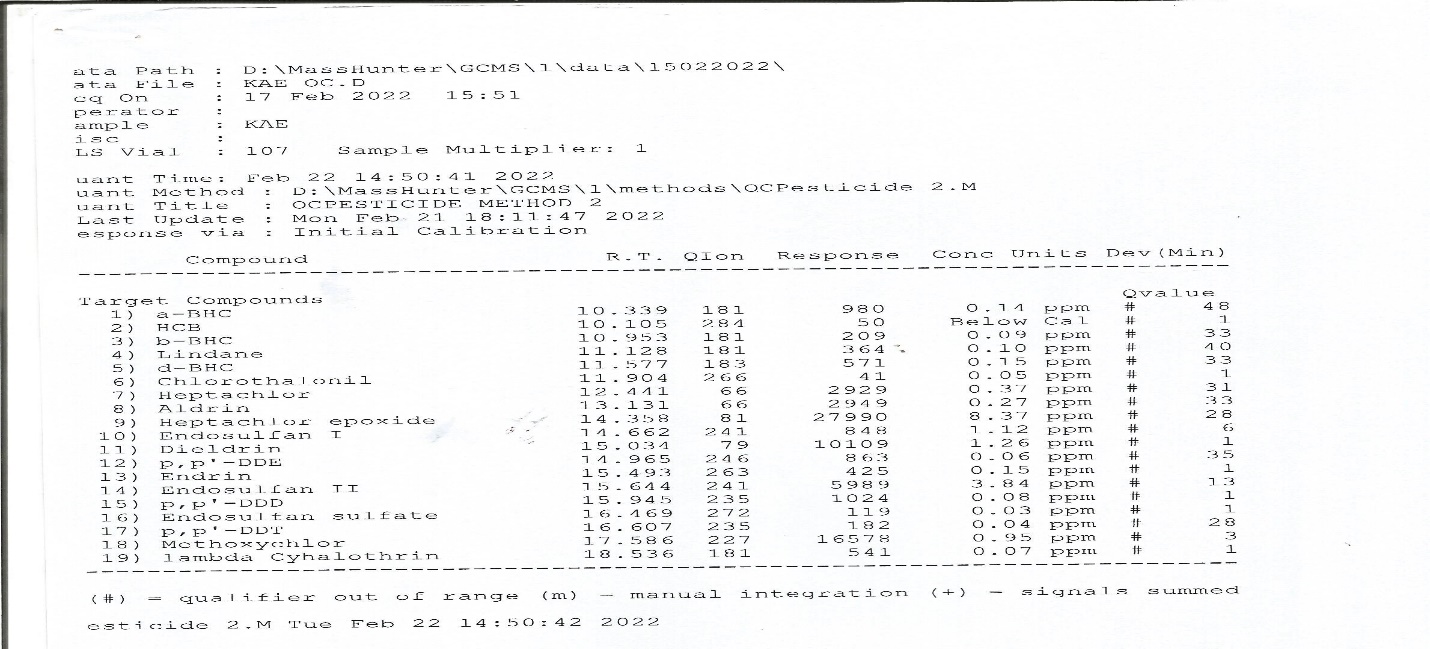


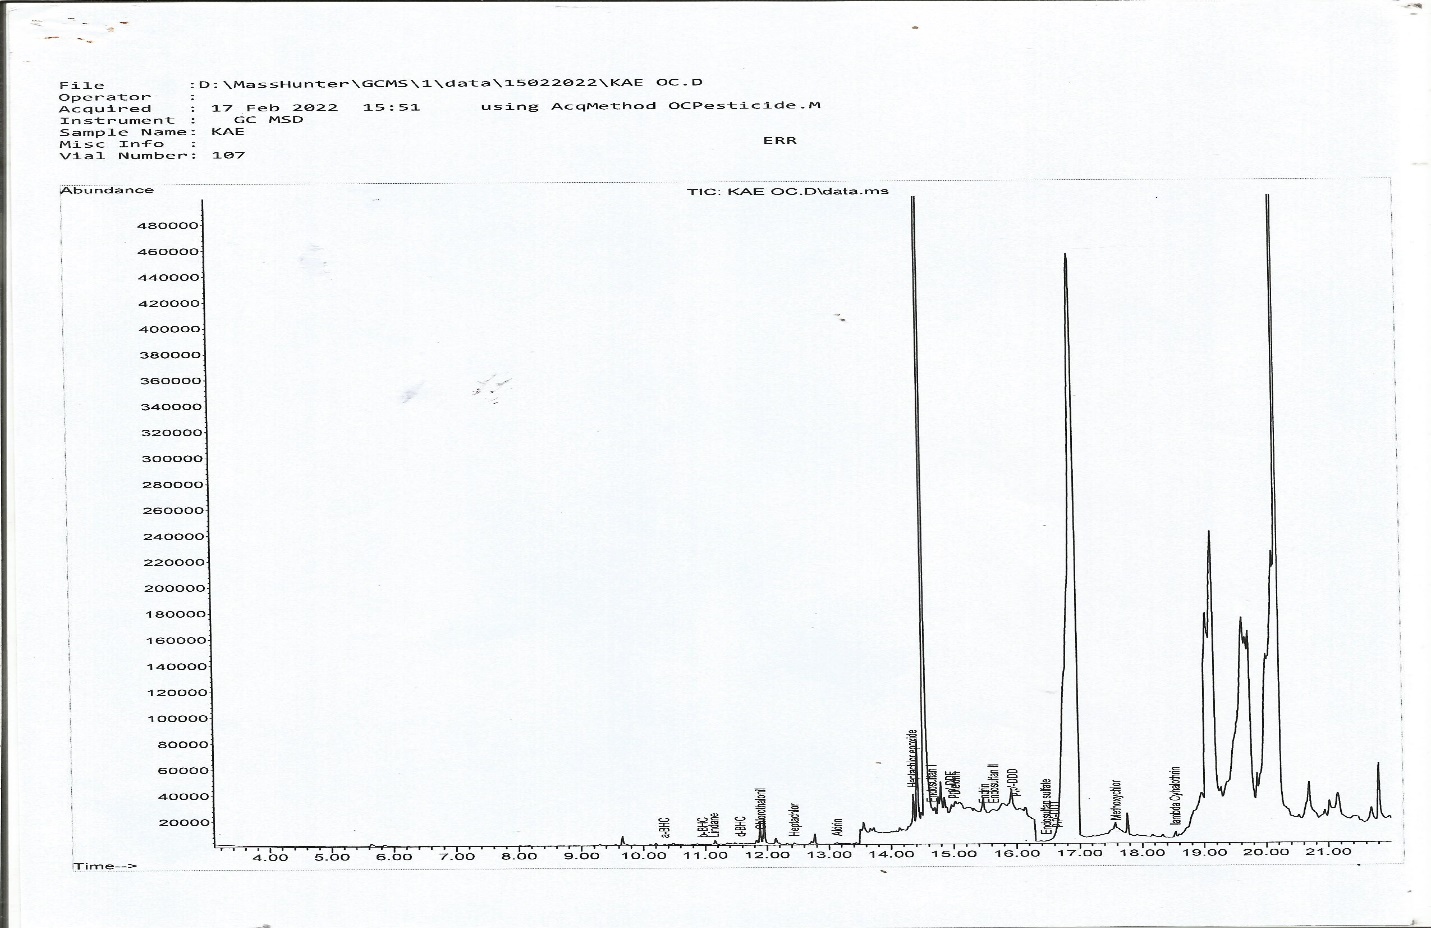


APPENDIX 16: Chromatogram of Jute leaf Sample


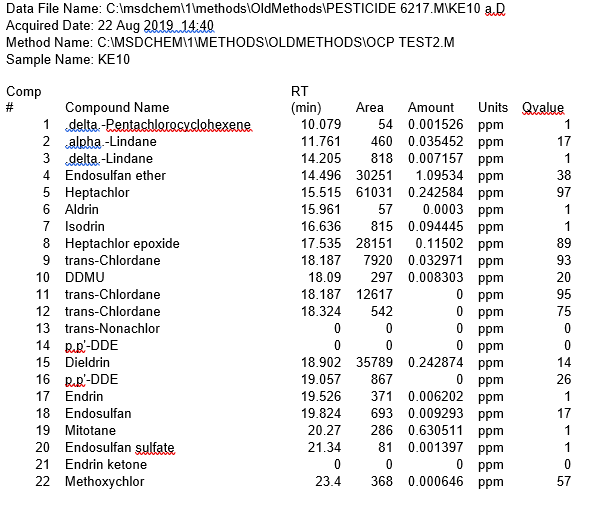


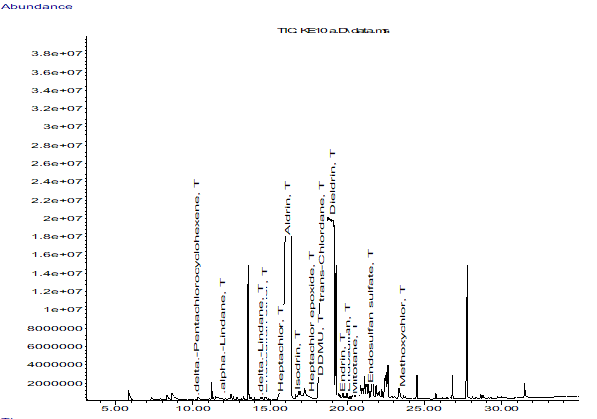


APPENDIX 17: Chromatogram of Okro Sample


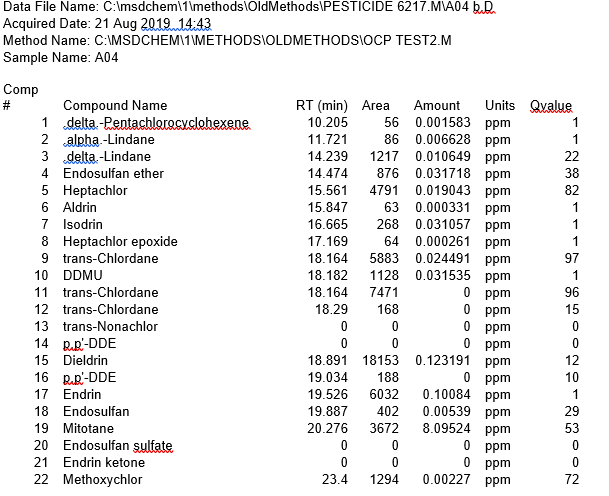


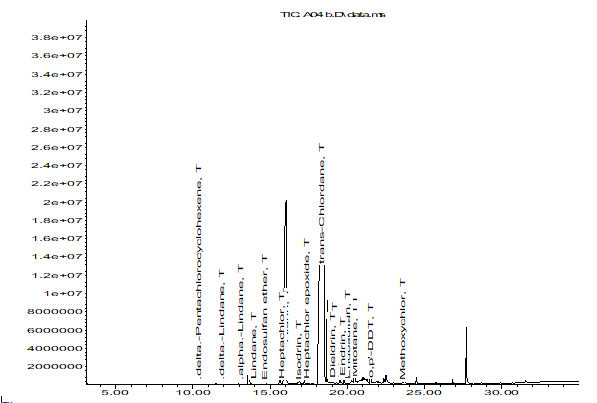


APPENDIX 18: Chromatogram of Okro Sample


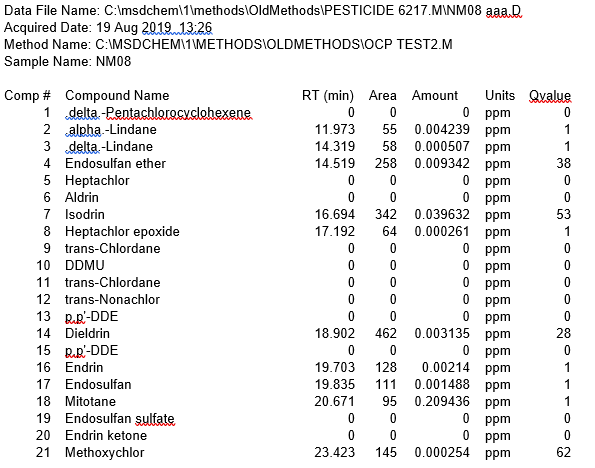


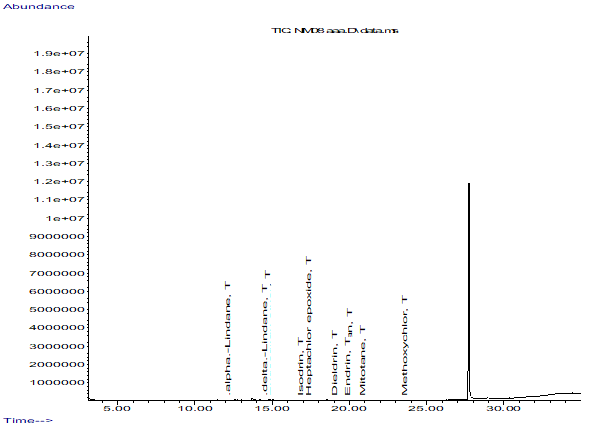


APPENDIX 19: Chromatogram of Okro Sample


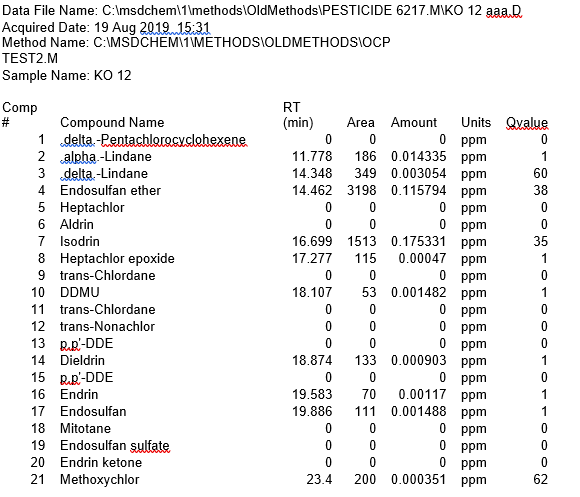


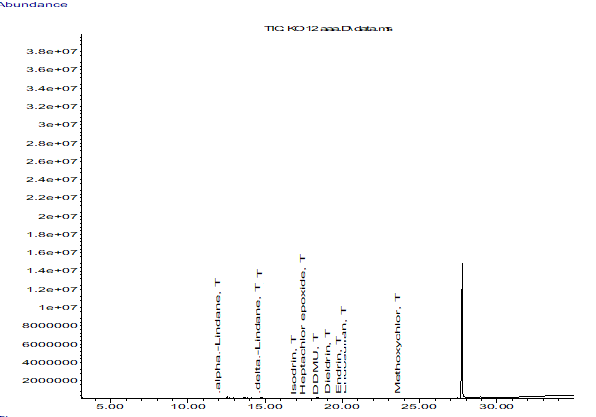


APPENDIX 20: Chromatogram of Okro Sample


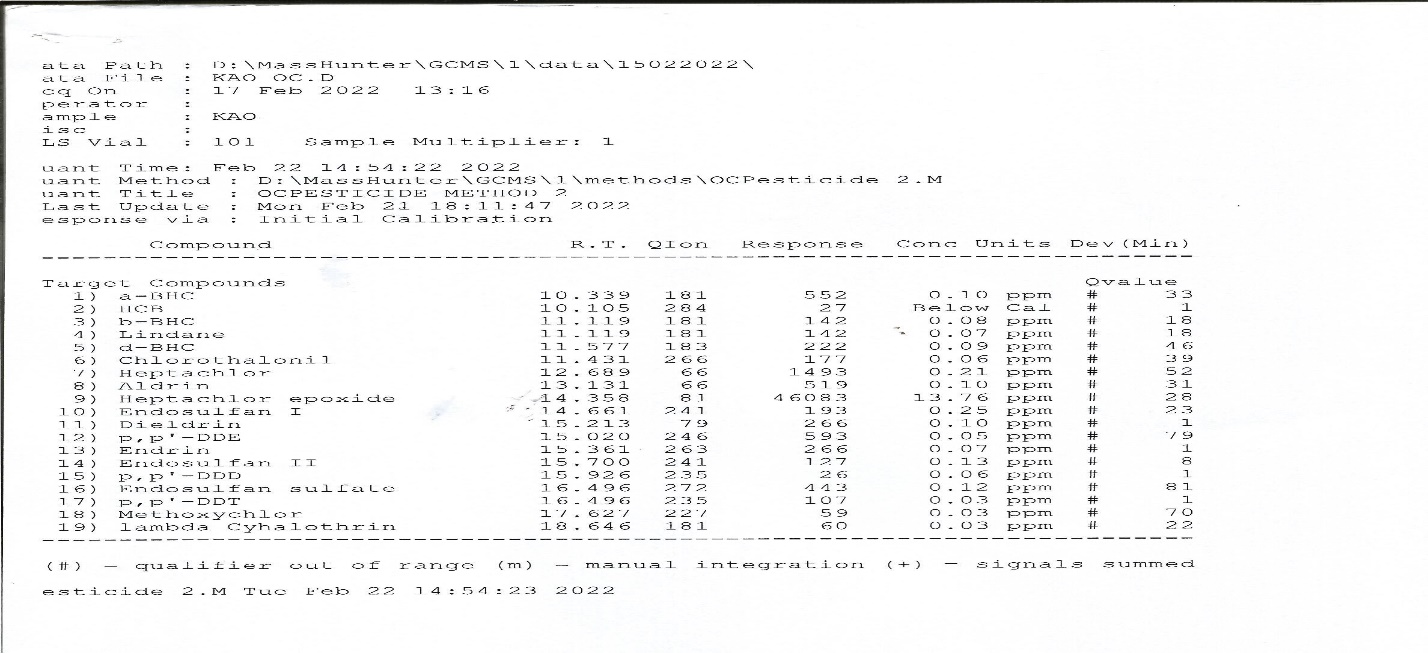


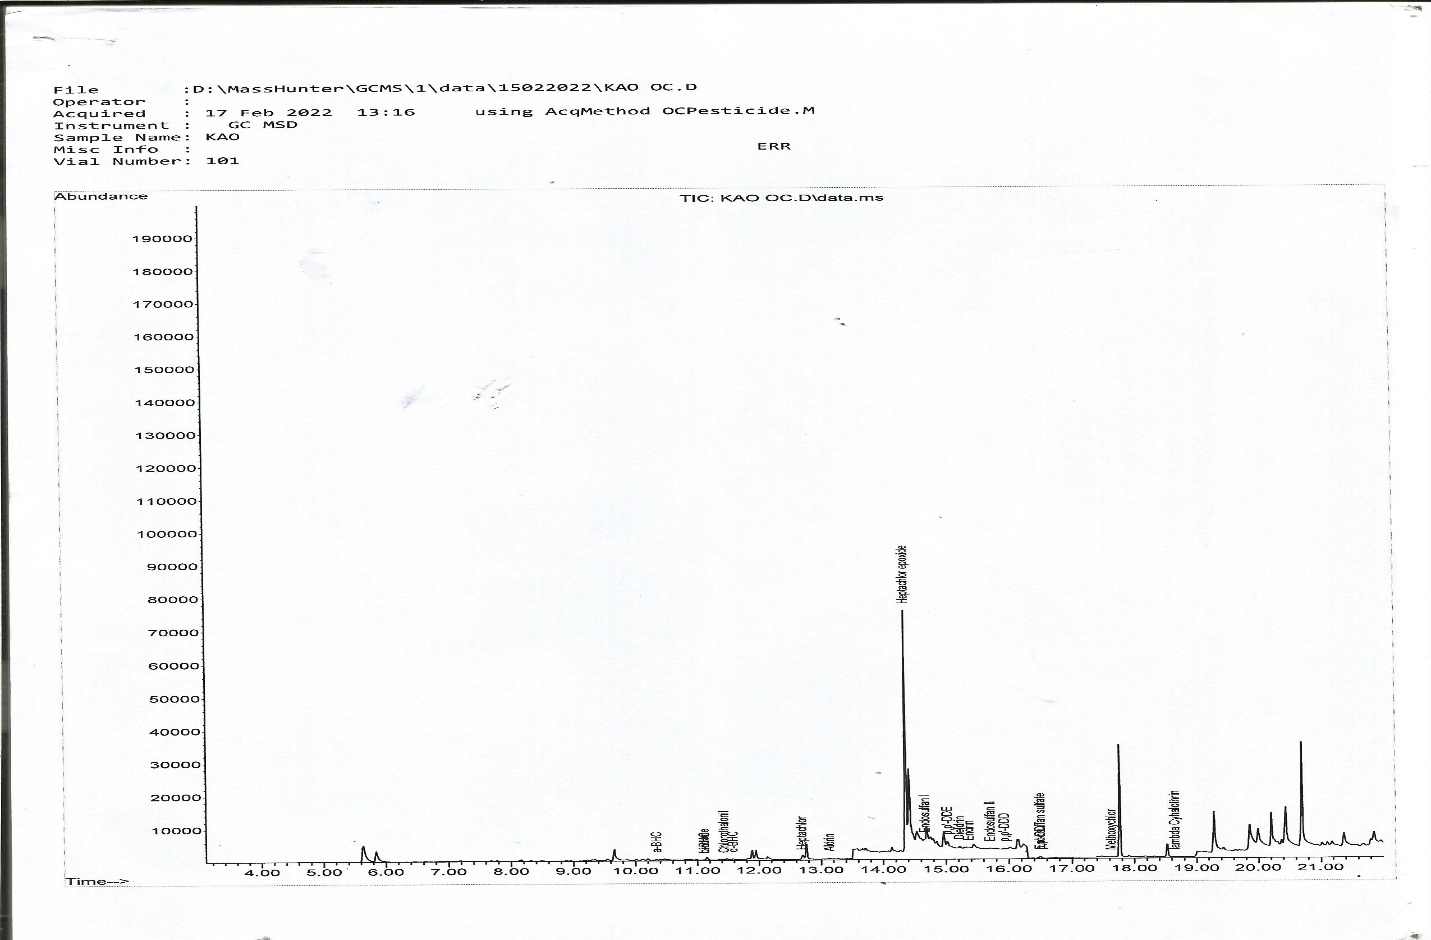


APPENDIX 21: Chromatogram of Okro Sample


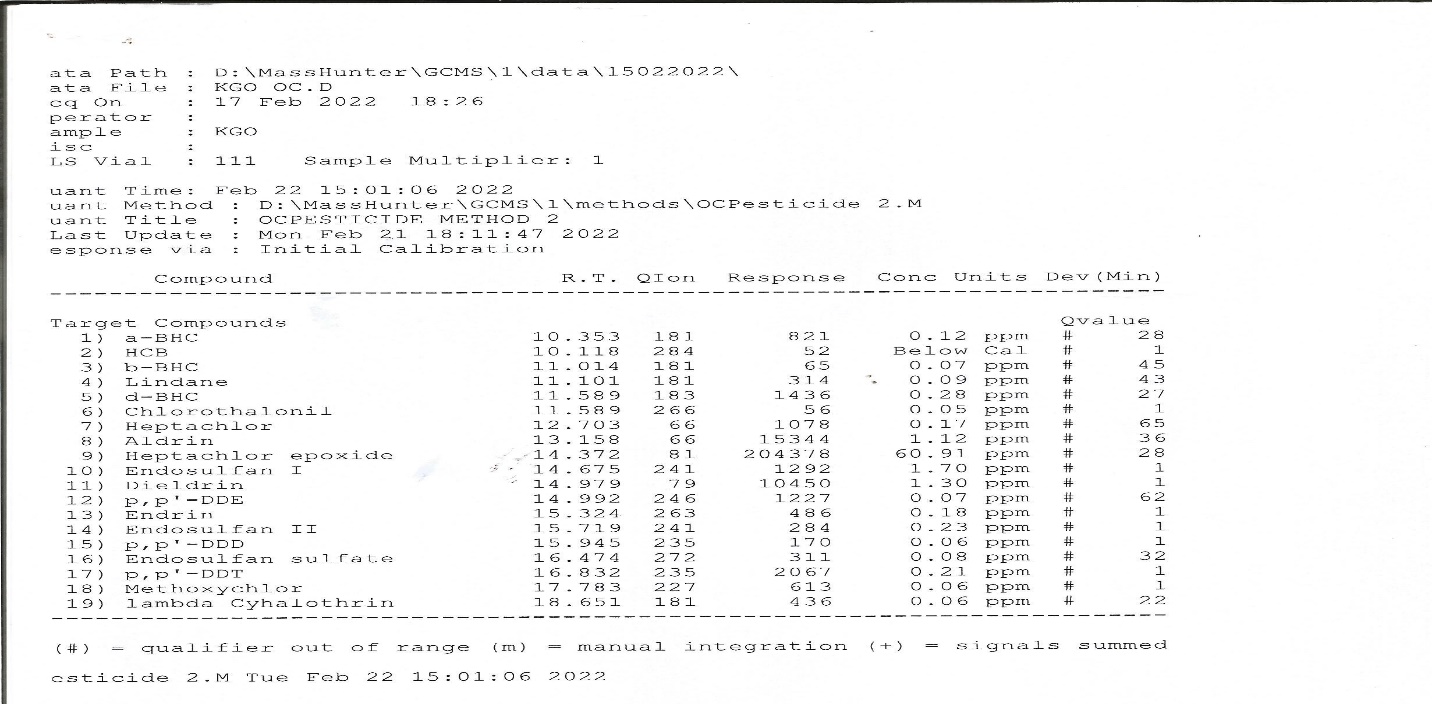


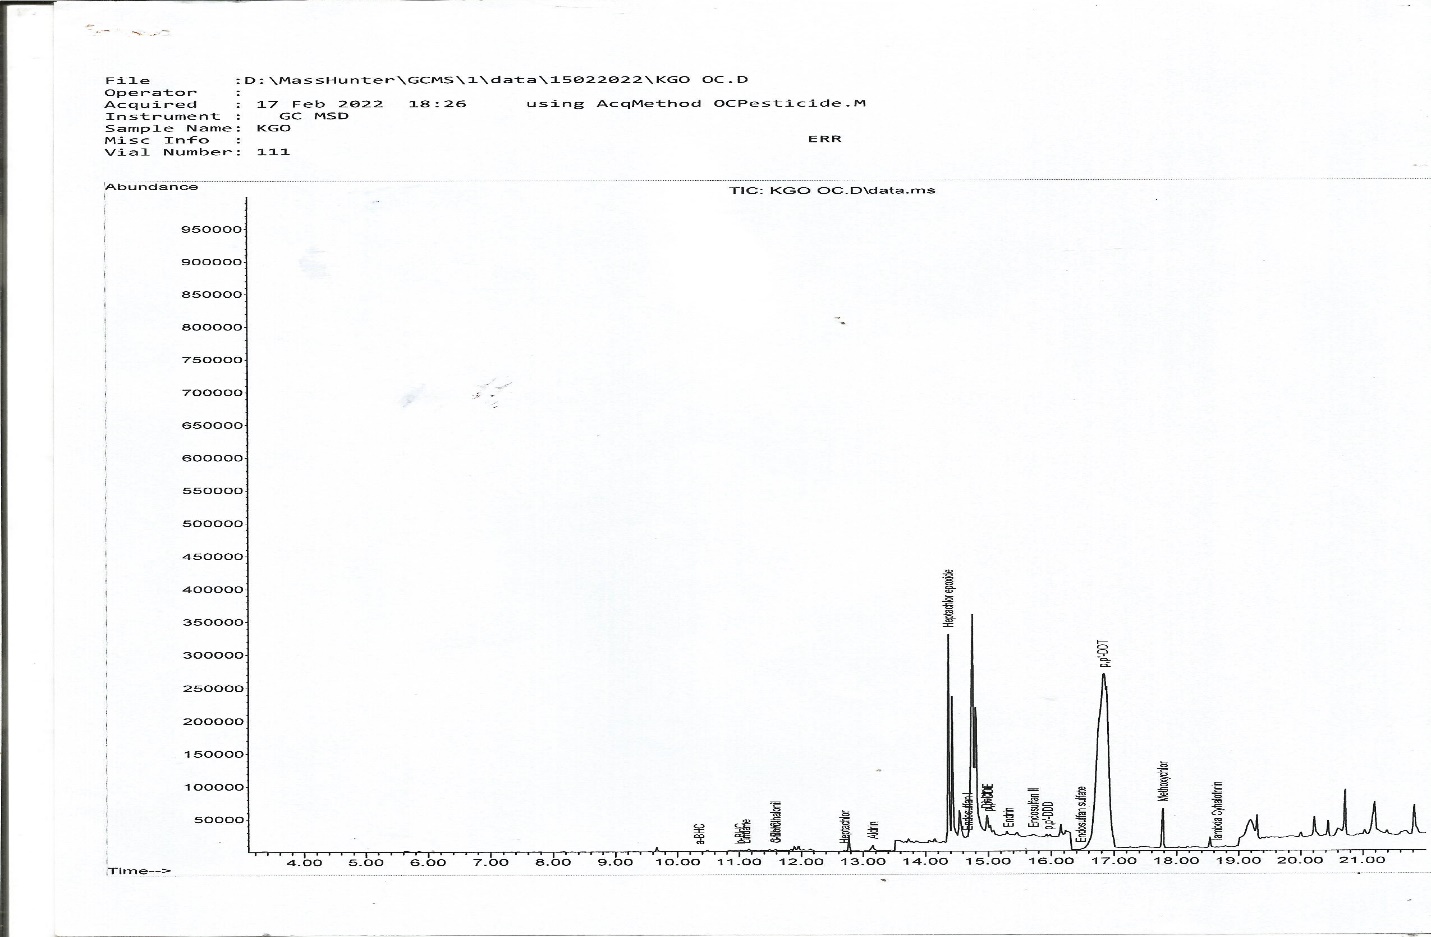


APPENDIX 22: Chromatogram of Tomatoes Sample


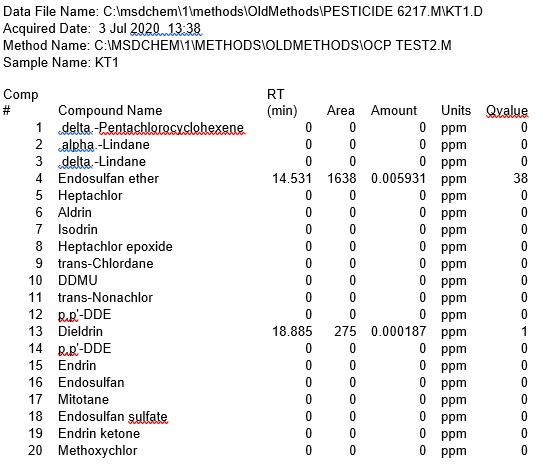


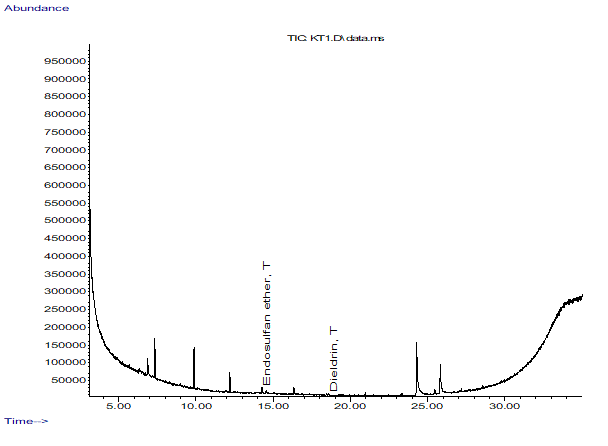


APPENDIX 23: Chromatogram of Tomatoes Sample


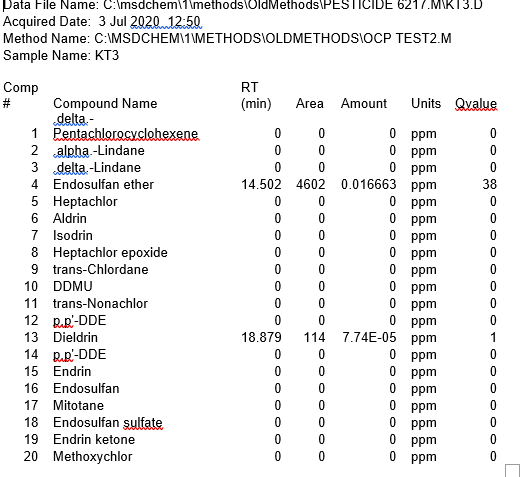


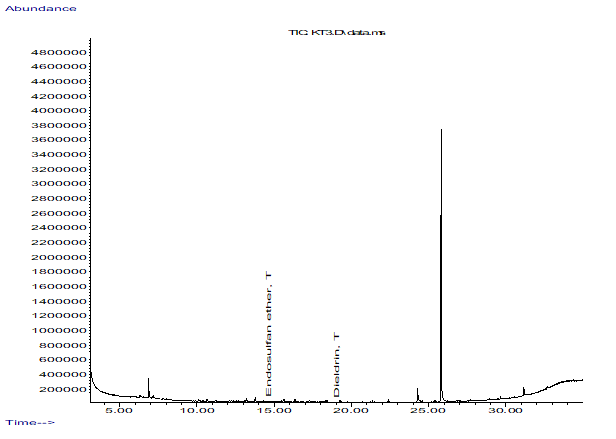


APPENDIX 24: Chromatogram of Tomatoes Sample


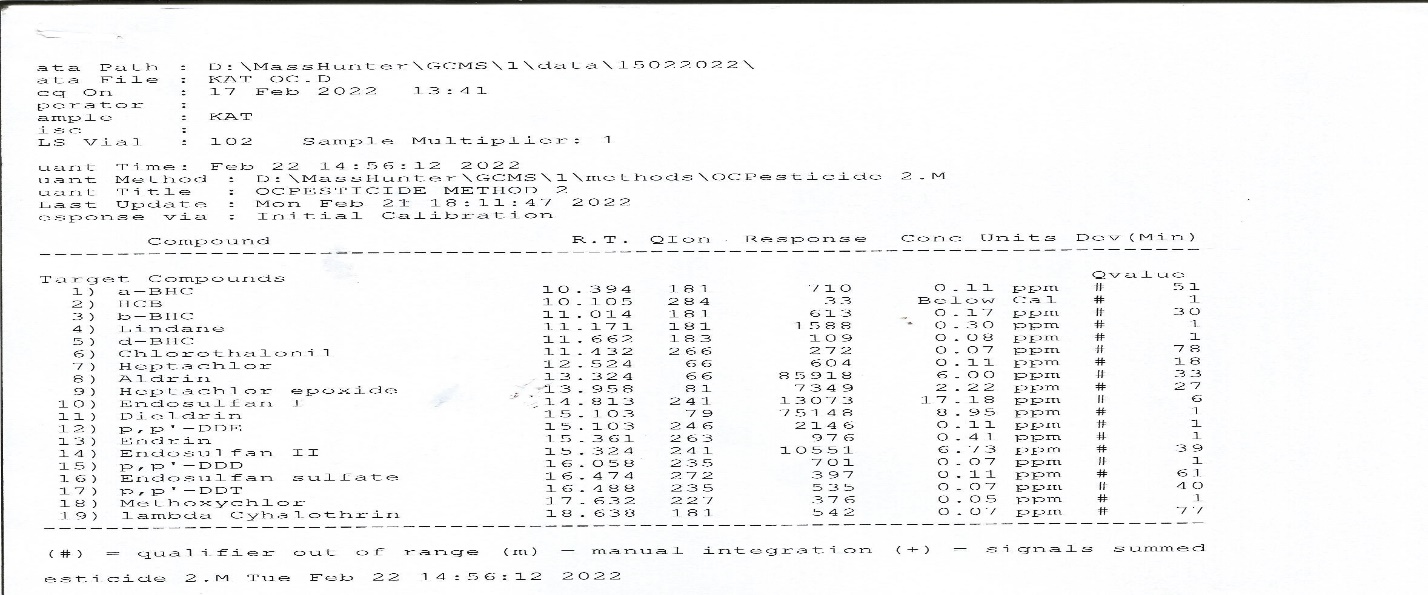


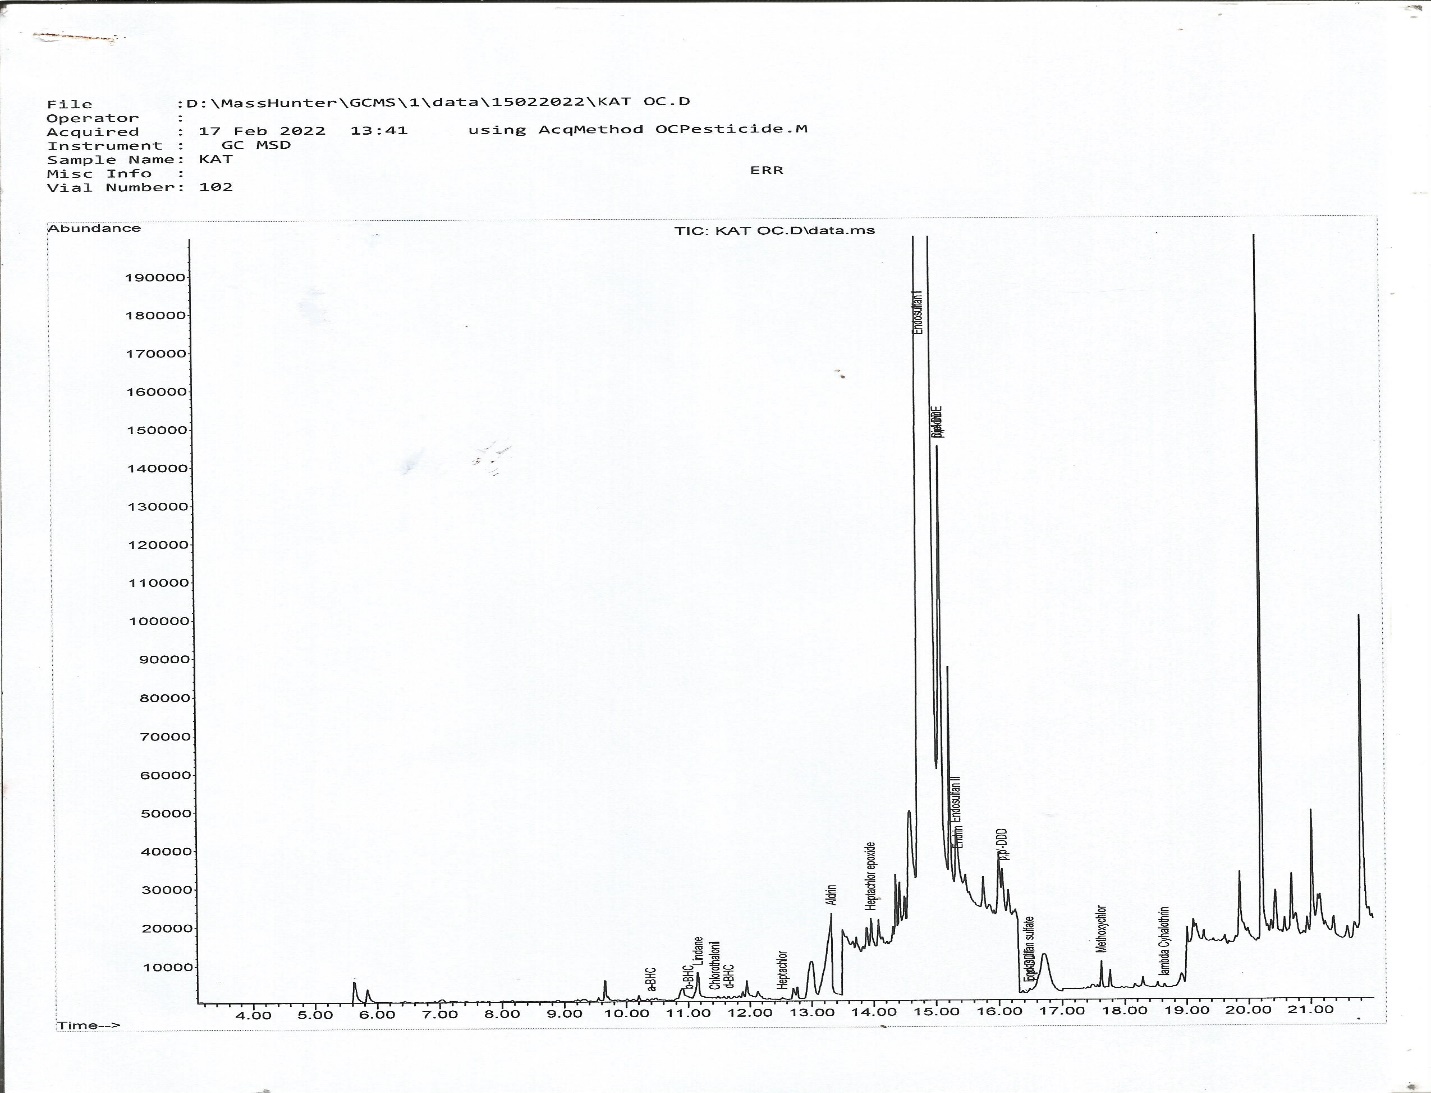


APPENDIX 25: Chromatogram of Tomatoes Sample


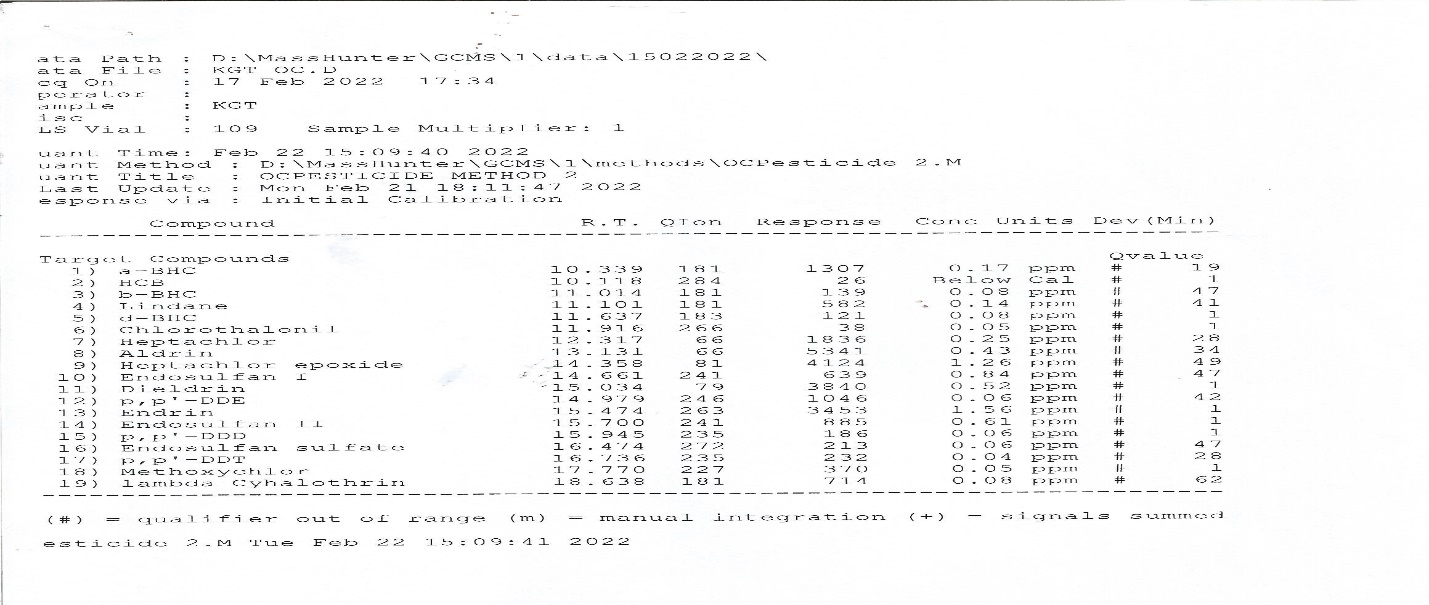


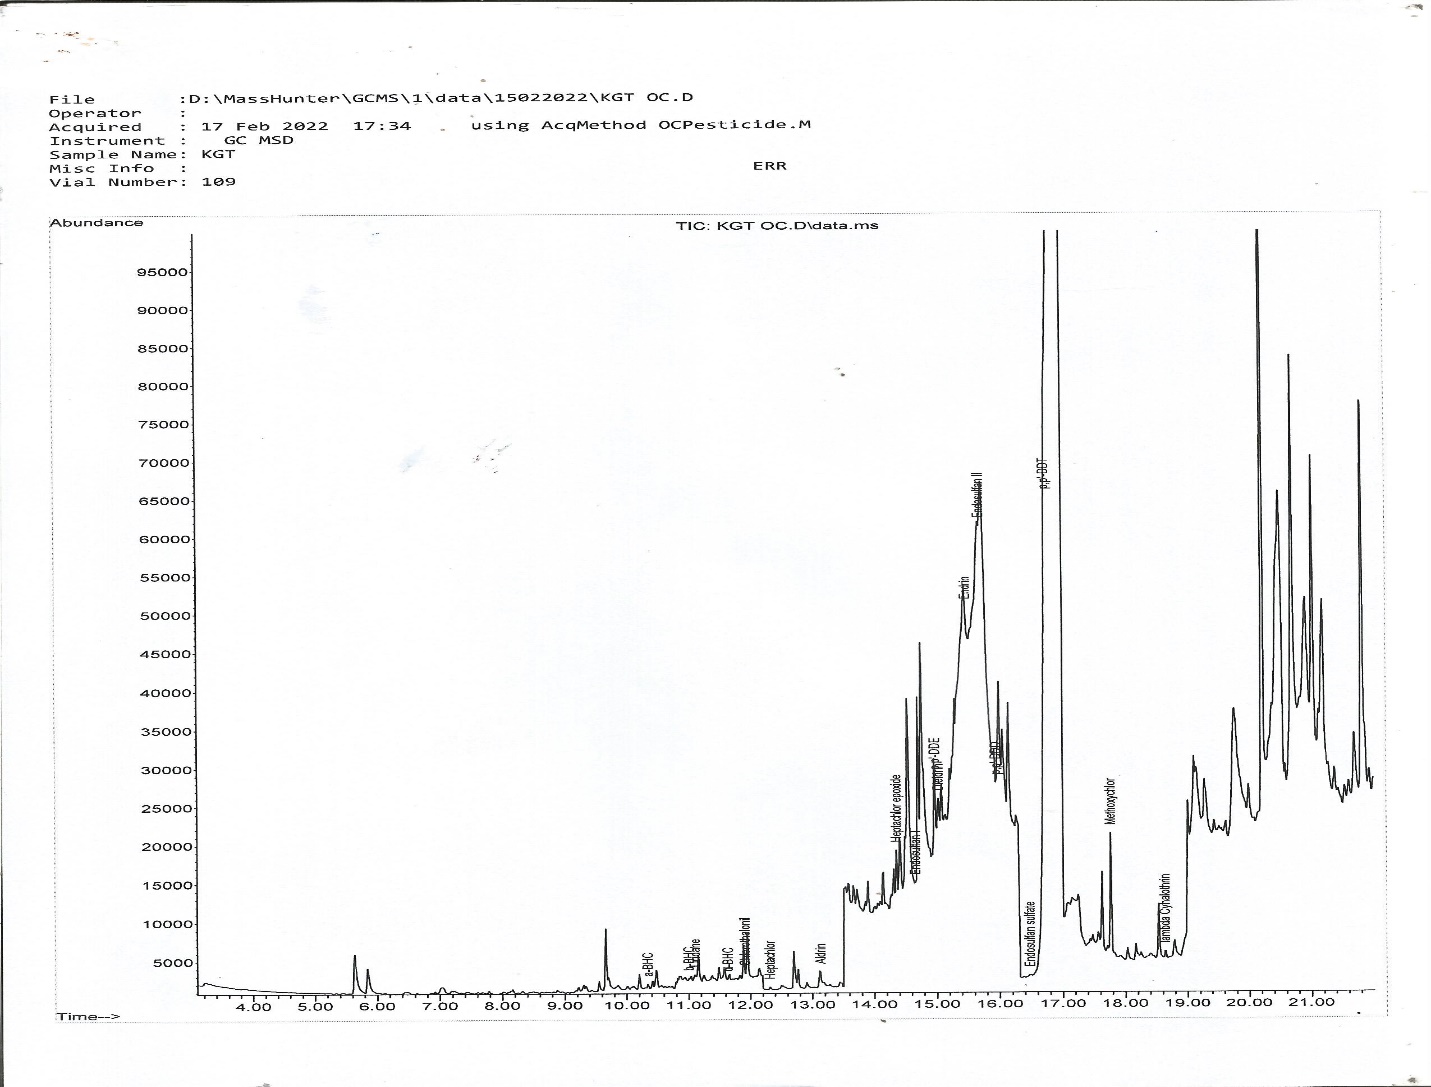


APPENDIX 26: Chromatogram of Cucumber Sample


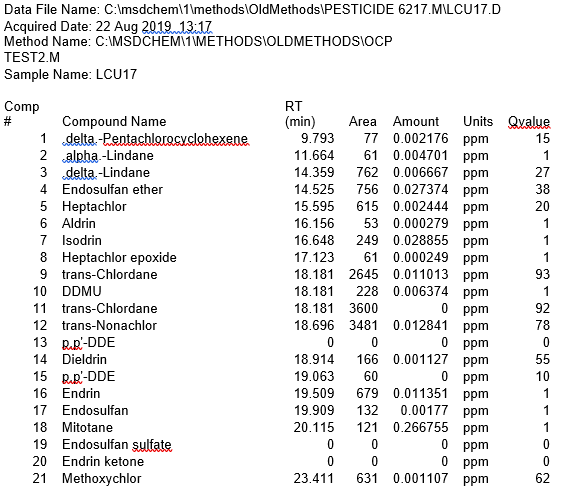


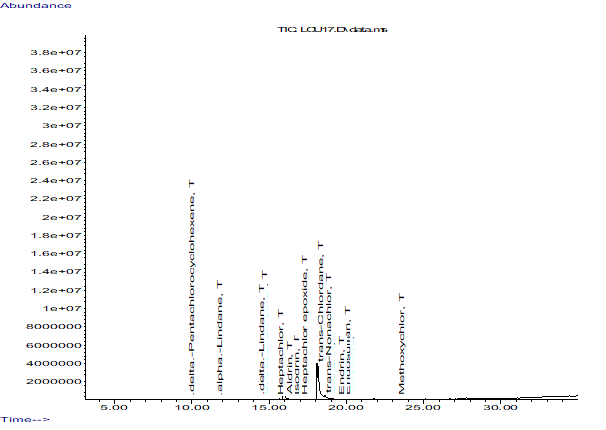


APPENDIX 27: Chromatogram of Cucumber Sample


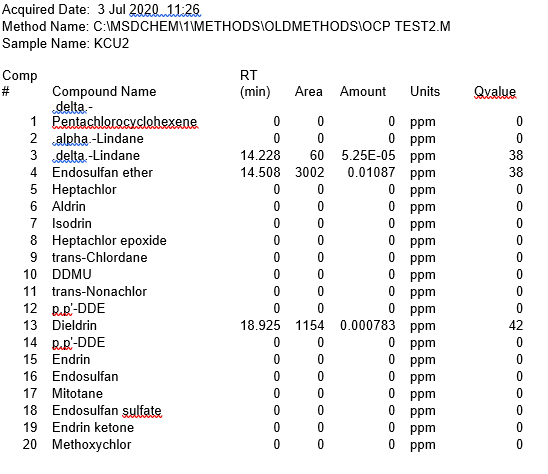


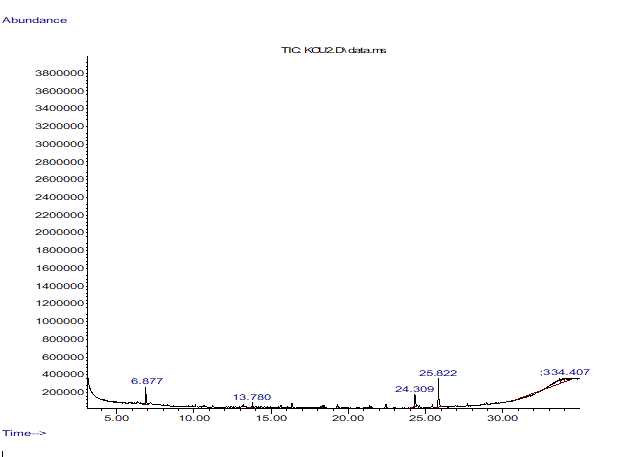


APPENDIX 28: Chromatogram of Cucumber Sample


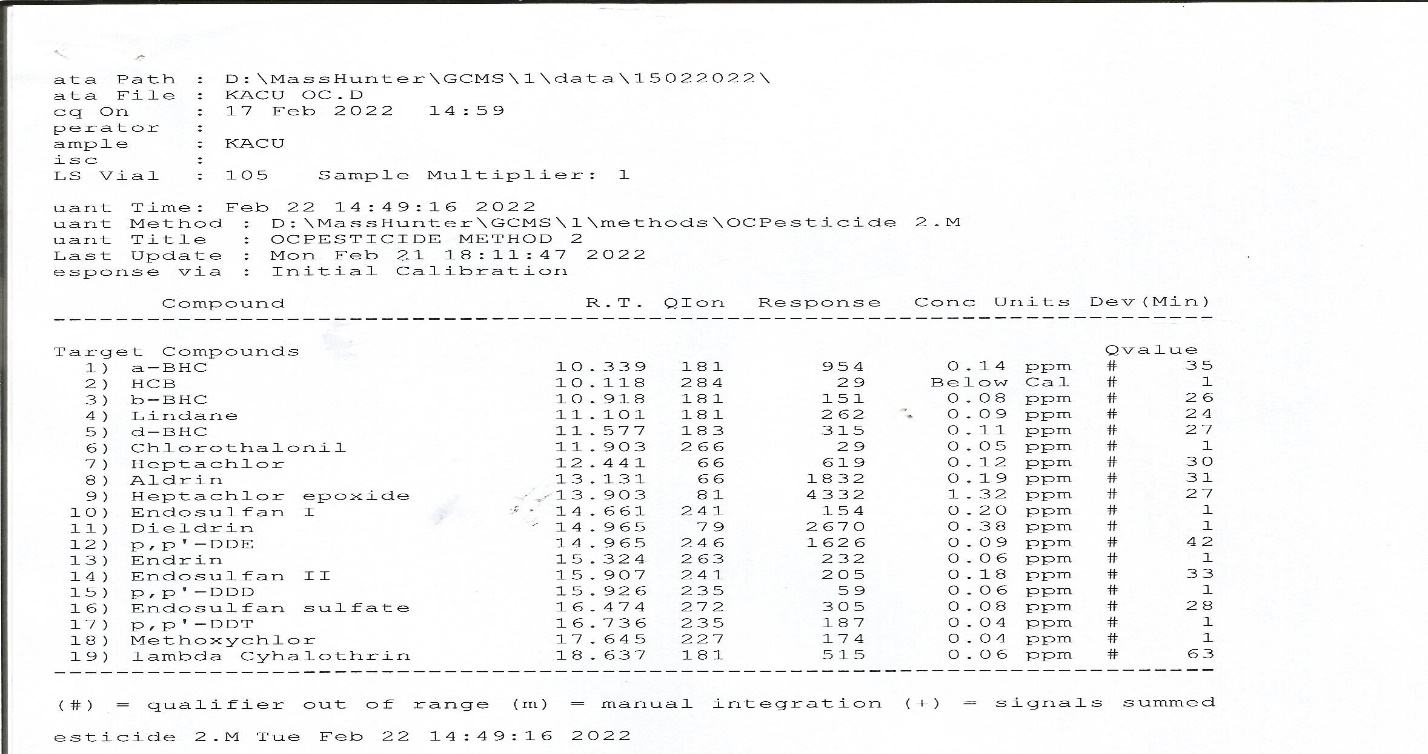


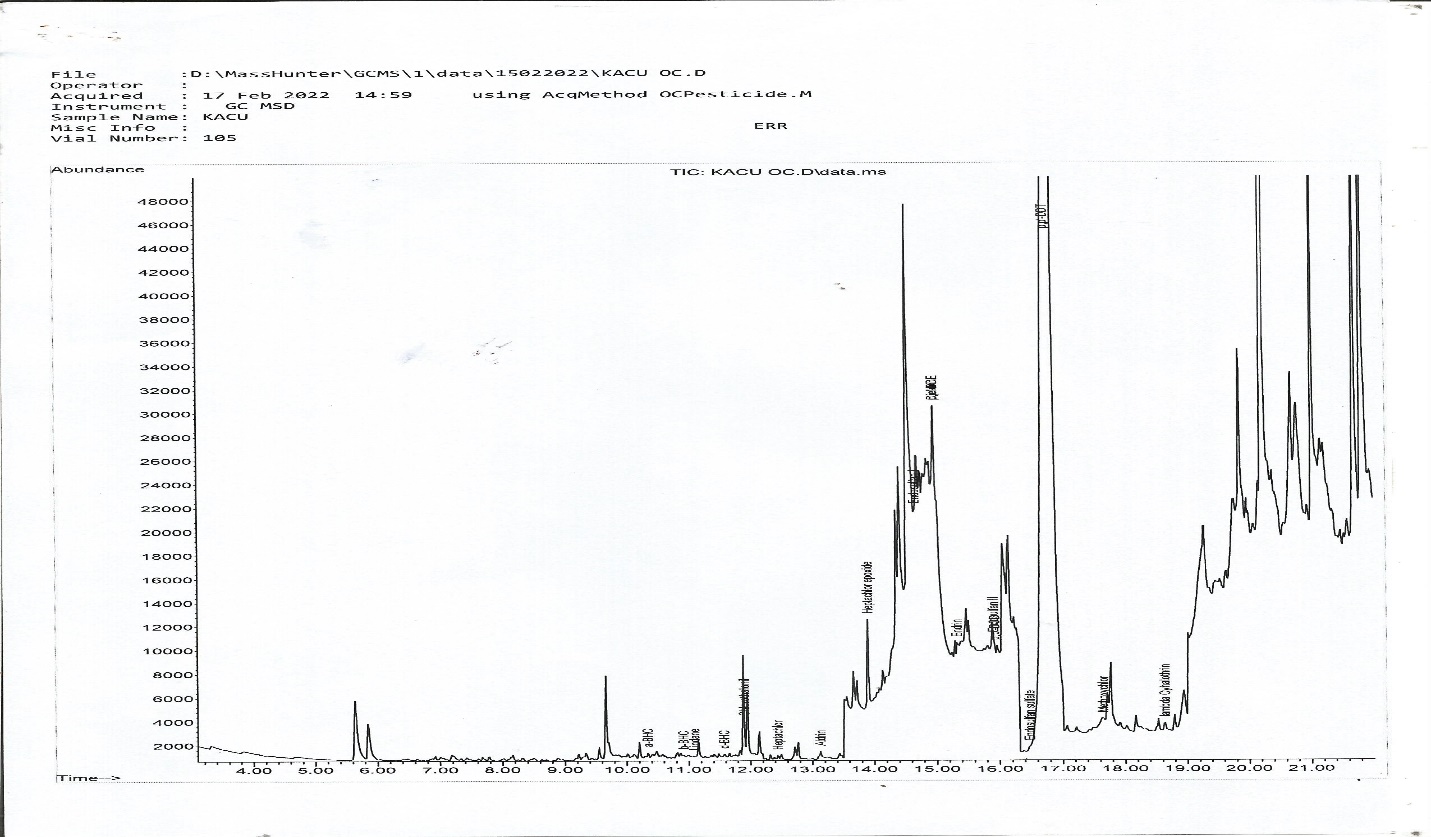


APPENDIX 29: Chromatogram of Cucumber Sample


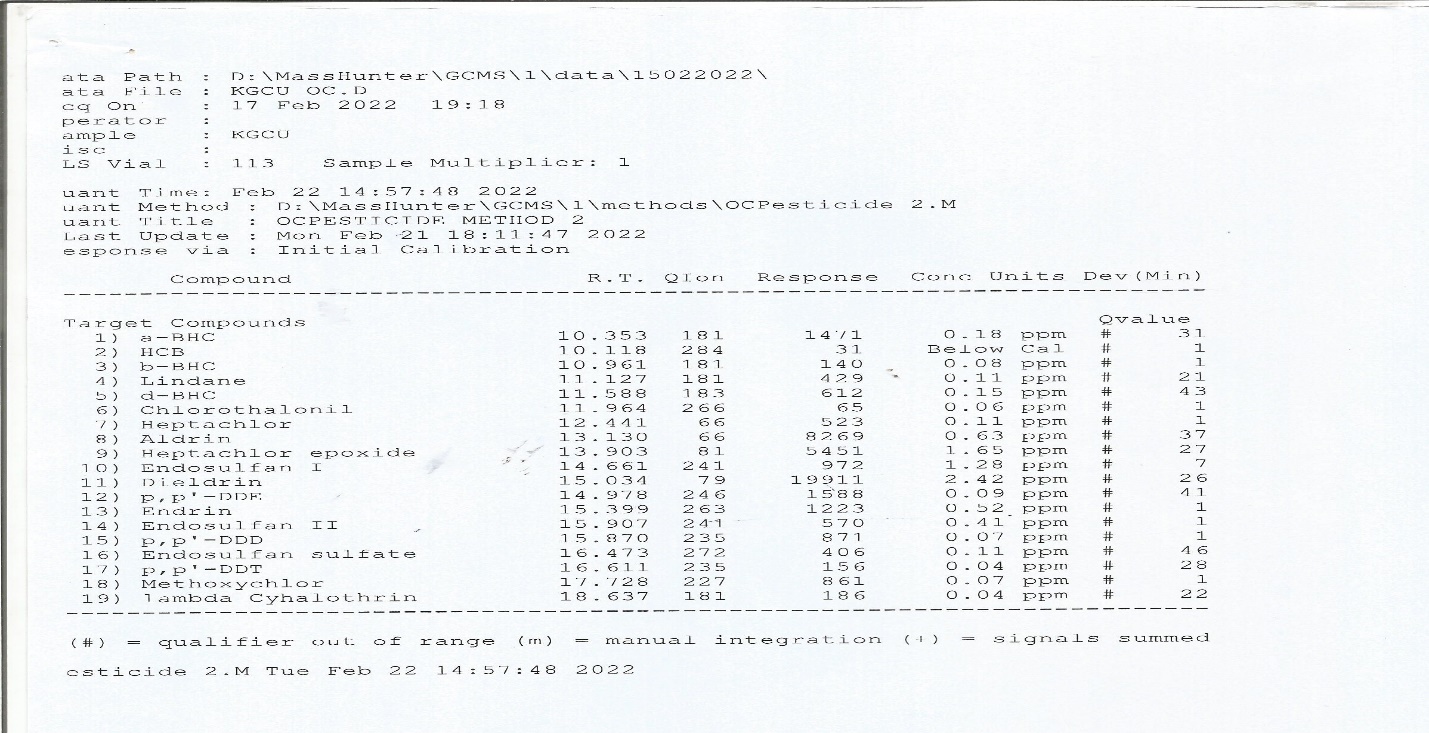


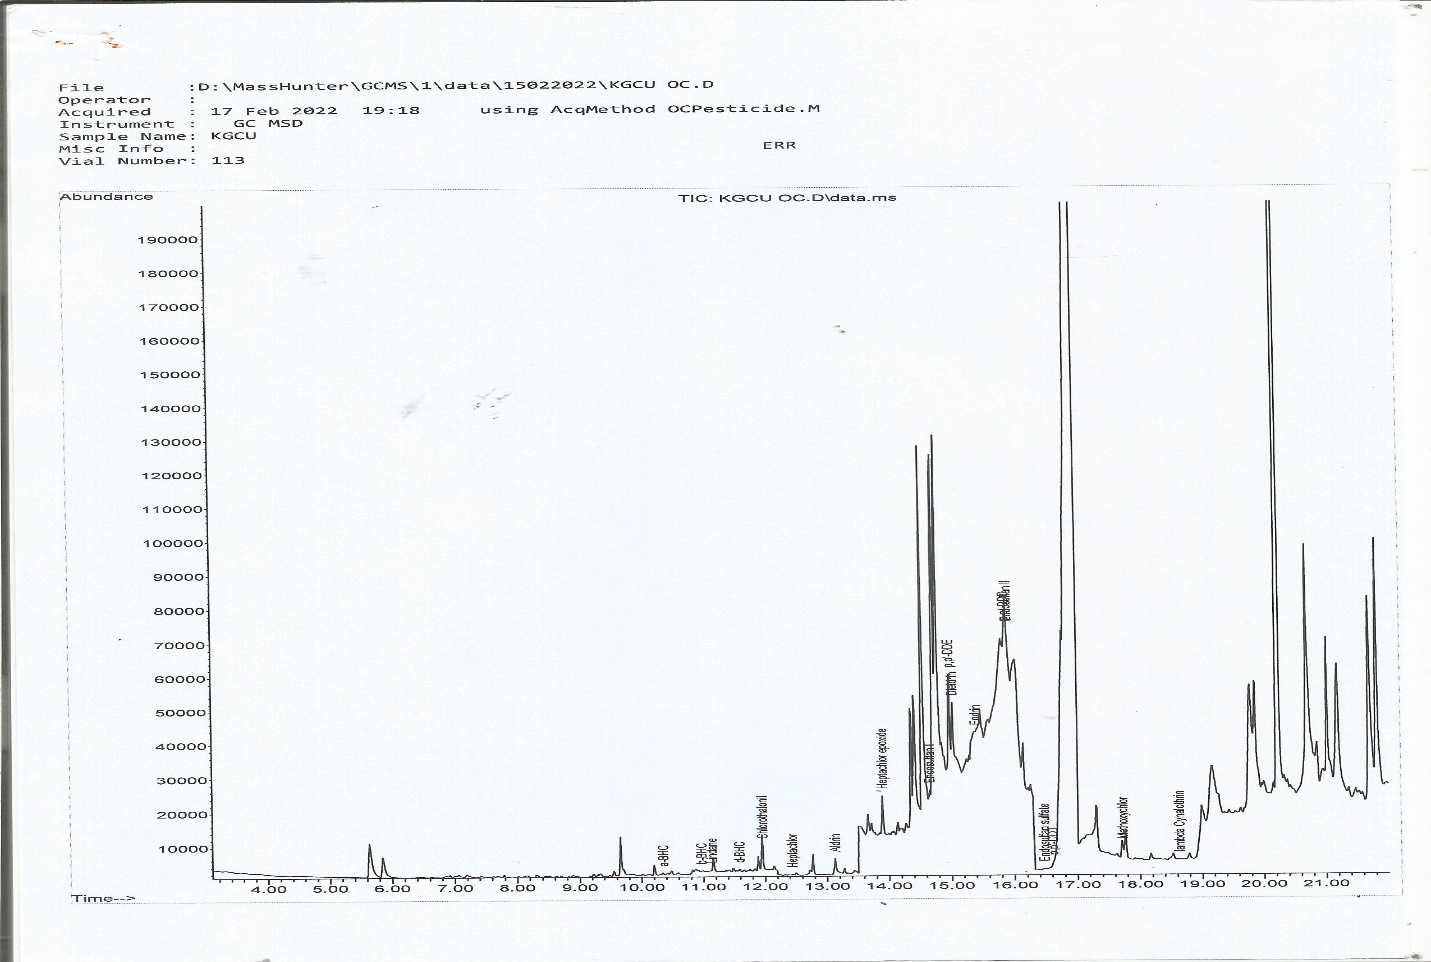


APPENDIX 30: Chromatogram of Garden egg Sample


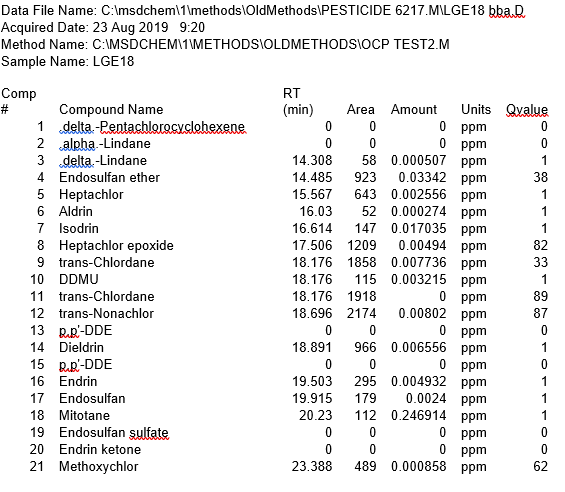


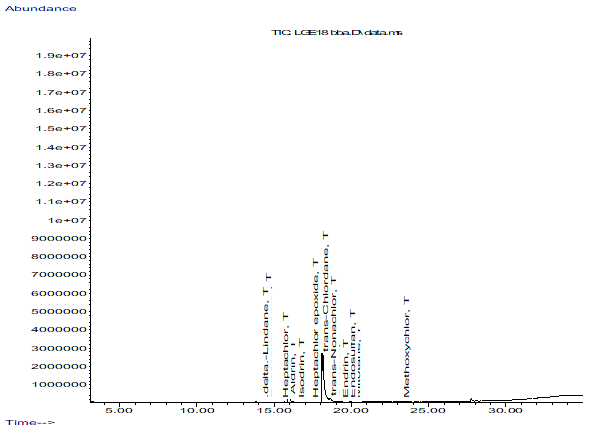


APPENDIX 31: Chromatogram of Garden egg Sample


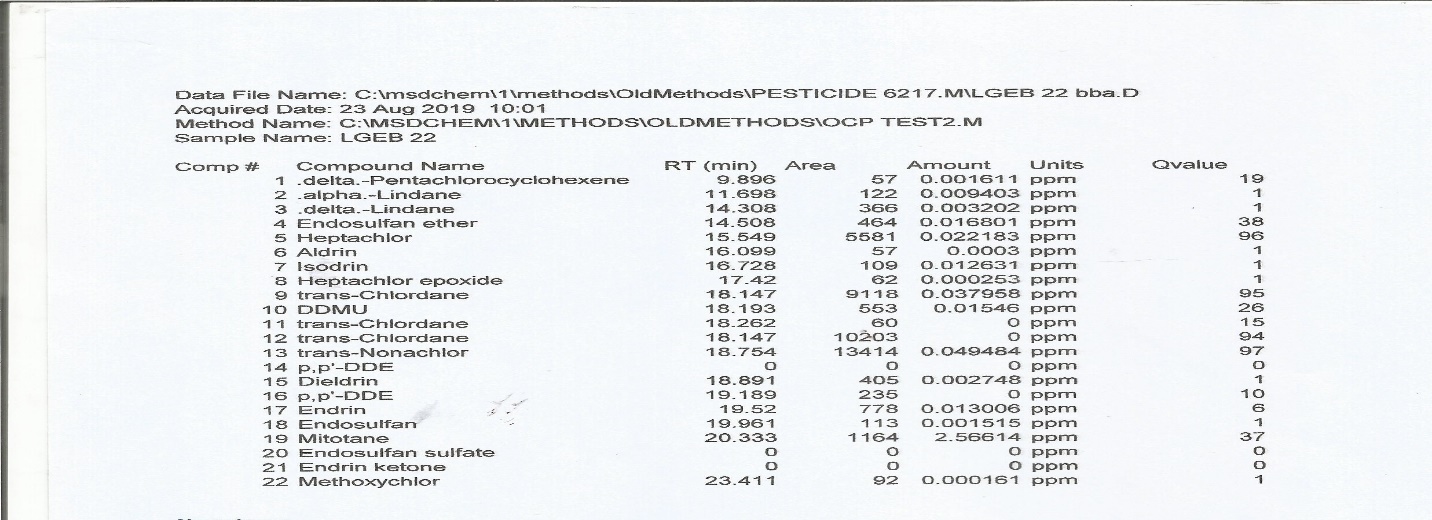


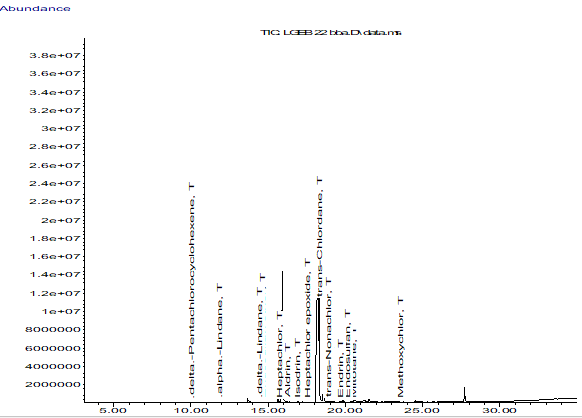


APPENDIX 32: Chromatogram of Garden egg Sample


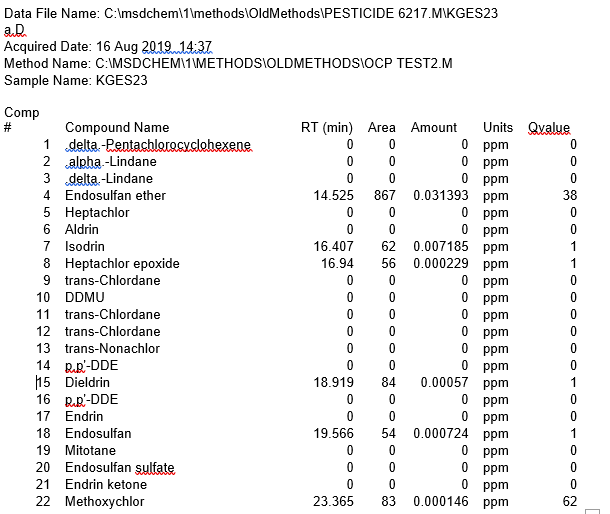


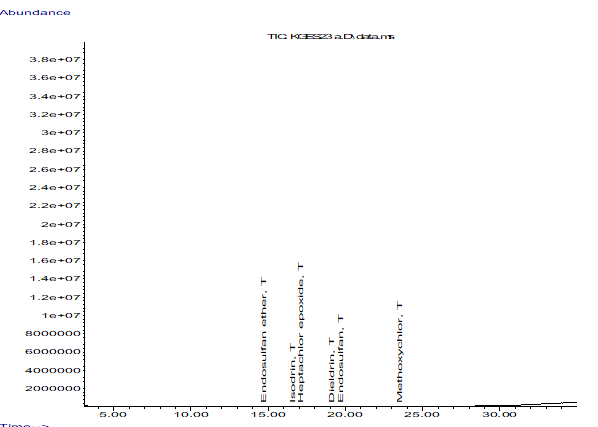


APPENDIX 33: Chromatogram of Garden egg Sample


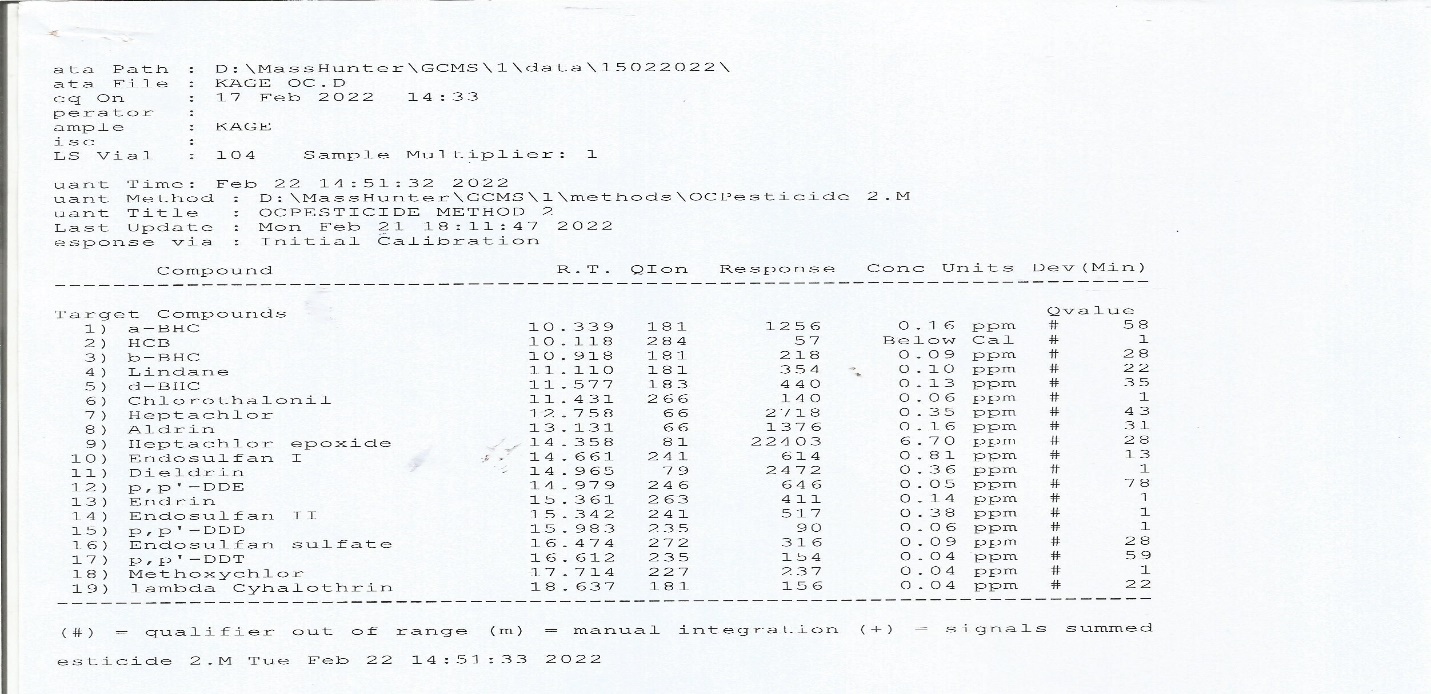


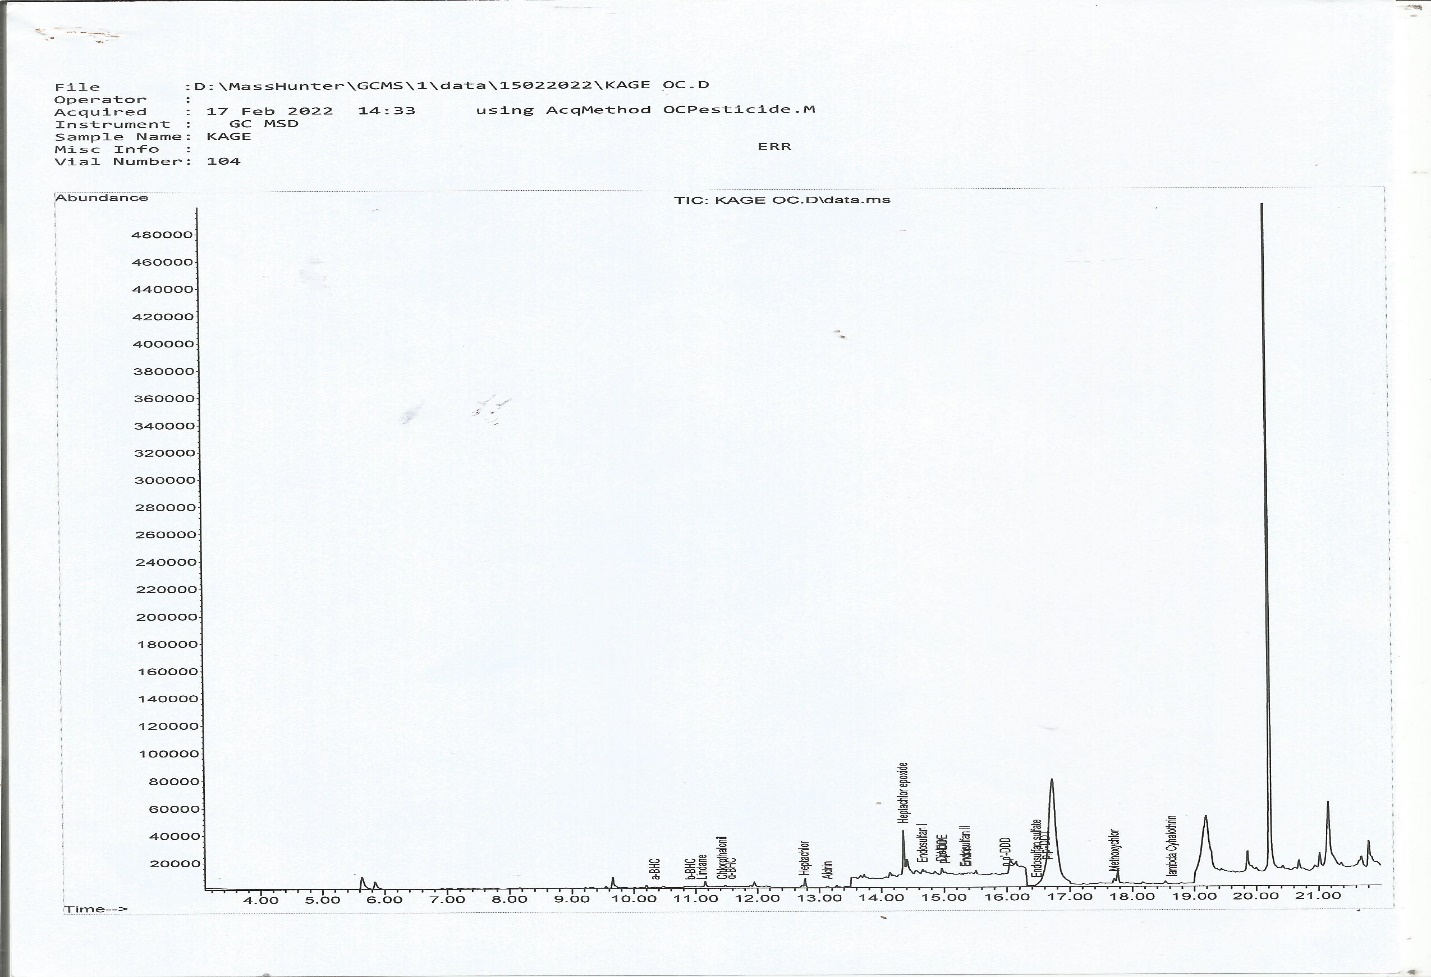


APPENDIX 34: Chromatogram of Garden egg Sample


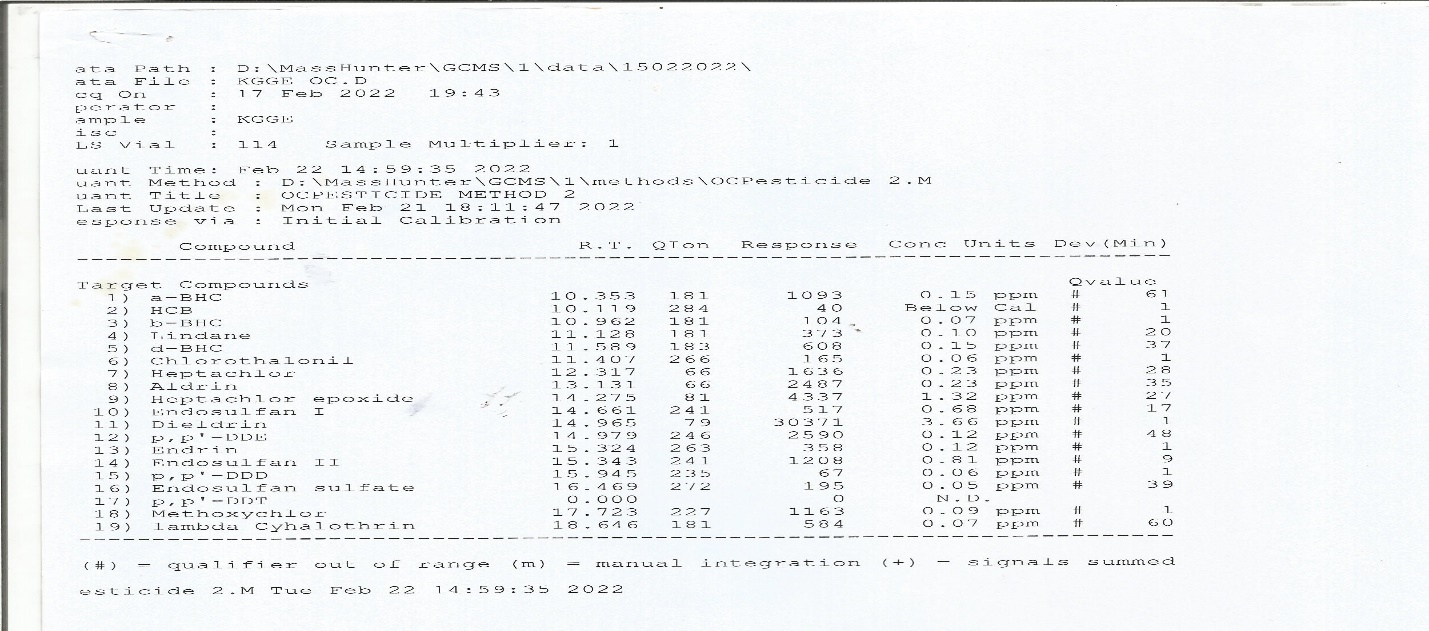

Supplement: Supplementary file 1 [file 8f859adaa9c2bb74000f5f11.docx]
